# Supplementary material for: Remote-controlled regio- and diastereodifferentiating photodimerization of a dynamic helical peptide-bound 2-substituted anthracene
Source: Royal Society of Chemistry journal article supplement (doi:10.1039/d0cc06164f), 2020-01-01
Supplement: d0cc06164f1.pdf [file d0cc06164f1.pdf]

Supporting Information for:

**Remote-controlled regio- and diastereodifferentiating photodimerization  
of a dynamic helical peptide-bound 2-substituted anthracene**

Daisuke Taura, Akio Urushima, Yusuke Sugioka, Naoki Ousaka<sup>†</sup> and Eiji Yashima\*

Department of Molecular and Macromolecular Chemistry, Graduate School of Engineering,  
Nagoya University, Chikusa-ku, Nagoya 464-8603, Japan.

<sup>†</sup>Present Address: Molecular Engineering Institute, Kyushu Institute of Technology,  
Tobata-ku, Kitakyushu, 804-8550, Japan.

E-mail: yashima@chembio.nagoya-u.ac.jp

## Table of Contents

|      |                                                                                                                                                                                                                                                                                                         |     |
|------|---------------------------------------------------------------------------------------------------------------------------------------------------------------------------------------------------------------------------------------------------------------------------------------------------------|-----|
| 1.   | Instruments and Materials                                                                                                                                                                                                                                                                               | S3  |
| 2.   | Synthetic Procedures                                                                                                                                                                                                                                                                                    | S4  |
| 3.   | General Procedures for Photodimerization of <b>1</b>                                                                                                                                                                                                                                                    | S11 |
| 4.   | Isolation of Stereoisomers and Diastereomers, and Structure Determination                                                                                                                                                                                                                               | S11 |
| 5.   | Temperature-Dependent CD and Absorption Spectral Changes of <b>6</b> in CH <sub>3</sub> CN                                                                                                                                                                                                              | S14 |
| 6.   | Photodimerization of <b>1</b> and Its Kinetic Study                                                                                                                                                                                                                                                     |     |
| 6-1. | Photodimerization of <b>1</b> in Degassed CD <sub>3</sub> CN at Various Temperatures<br>(runs 1–8, Table 1)                                                                                                                                                                                             | S15 |
| 6-2. | Determination of Relative Yields of Photodimers and Diastereomeric Excesses of<br>Chiral <i>syn</i> -Photodimers Obtained by Photodimerization of <b>1</b> under Various Conditions<br>and Plots of the Natural Logarithms of the HT/HH and Diastereomeric Ratios<br>against the Reciprocal Temperature | S23 |
| 7.   | ROESY NMR Spectrum of <b>1</b>                                                                                                                                                                                                                                                                          | S25 |
| 8.   | Concentration- and Temperature-Dependent <sup>1</sup> H NMR Spectral Changes                                                                                                                                                                                                                            |     |
| 8-1. | Concentration-Dependent <sup>1</sup> H NMR Spectral Changes of <b>1</b> in CD <sub>3</sub> CN                                                                                                                                                                                                           | S29 |
| 8-2. | Temperature-Dependent <sup>1</sup> H NMR Spectral Changes of <b>1</b> and <b>6</b> in CD <sub>3</sub> CN                                                                                                                                                                                                | S30 |
| 9.   | Comparison of the Cotton Effect Signs of Chiral <i>anti</i> - and <i>syn</i> -Photodimers<br>with that of <b>1</b>                                                                                                                                                                                      | S32 |
| 10.  | Supporting References                                                                                                                                                                                                                                                                                   | S33 |
| 11.  | Spectroscopic Data                                                                                                                                                                                                                                                                                      | S34 |

## 1. Instruments and Materials.

### Instruments

The melting points were measured on a Yanaco MP-500D micromelting point apparatus (Yanaco, Kyoto, Japan) and were uncorrected. The IR spectra were recorded on a JASCO FT/IR-680 spectrophotometer (JASCO, Tokyo, Japan). The NMR spectra were measured on a Bruker Ascend 500 (Bruker Biospin, Billerica, MA, USA) or a Varian 500AS (Agilent Technologies, Santa Clara, CA, USA) spectrometer operating at 500 MHz for  $^1\text{H}$  and 126 MHz for  $^{13}\text{C}$  using a Teflon-valved NMR tube (5-mm (i.d.)) (Norell Inc.). Chemical shifts are reported in parts per million ( $\delta$ ) downfield from tetramethylsilane (TMS) in  $\text{CDCl}_3$  using a solvent residual peak as the internal standard. The absorption and CD spectra were measured in a 0.05-cm quartz cell using a JASCO V-750 spectrophotometer and a JASCO J-1500 spectropolarimeter, respectively. The temperature was controlled with a JASCO PTC-510 apparatus (+50 to  $-20\text{ }^\circ\text{C}$ ) or a liquid nitrogen-controlled quartz cell (0.1-cm) in a cryostat (+25 to  $-40\text{ }^\circ\text{C}$ ). The photoirradiation ( $\lambda > 400\text{ nm}$ ) was performed using a 500 W xenon lamp (Ushio Optical Module SX-UI500XQ) through a cut-off filter (SIGMAKOKI Co., Ltd.). The temperature during the photoirradiation was controlled using an ultra-cooling reactor (UCR-150N) (Techno Sigma Co., Ltd., Okayama, Japan). The electrospray ionization (ESI) mass spectra were recorded using a JEOL JMS-T100CS mass spectrometer (JEOL, Akishima, Japan). The matrix-assisted laser desorption-ionization time-of-flight mass (MALDI-TOF-MS) spectra were measured using a Bruker autoflex maX (Bruker Daltonik, Bremen, Germany) with a positive mode using 1,8,9-anthracene triol (dithranol) as the matrix. The HPLC separation of stereoisomeric and diastereomeric photodimers was performed on a JASCO PU-2080 liquid chromatograph equipped with UV-visible (JASCO UV-2070) and CD (JASCO CD-2095) dual detectors using a COSMOSIL 5C<sub>18</sub>-MS-II column (0.46 (i.d.)  $\times$  25 cm, Nacalai Tesque, Kyoto, Japan).

### Materials

All starting materials and dehydrated solvents were purchased from Aldrich (Milwaukee, WI), Wako Pure Chemical Industries (Osaka, Japan) and Tokyo Chemical Industry (Tokyo, Japan) unless otherwise noted. Silica gel ( $\text{SiO}_2$ ) was purchased from Kanto Chemical (Tokyo, Japan). Fmoc-Api(Boc)-OH,<sup>S1</sup> Boc-(Ac<sub>6</sub>c)<sub>2</sub>-OBzl,<sup>S2</sup> Boc-L-Val-Aib-OTg<sup>S2</sup> and Z-Ac<sub>6</sub>c-OH<sup>S3</sup> were synthesized according to the reported methods.

## 2. Synthetic Procedures.

Abbreviations of chemicals:

Boc: *tert*-butoxycarbonyl,

Bzl: benzyl,

Fmoc: fluorenyl-9-methoxycarbonyl,

Aib:  $\alpha$ -aminoisobutyric acid,

Ac<sub>6</sub>c: 1-aminocyclohexanecarboxylic acid,

Api: 4-aminopiperidine-4-carboxylic acid,

HATU: *O*-(7-azabenzotriazol-1-yl)-1,1,3,3-tetramethyluronium hexafluorophosphate,

EDC·HCl: 1-ethyl-3-(3-dimethylaminopropyl)-carbodiimide hydrochloride,

HOAt: 7-aza-1-hydroxy-1,2,3-benzotriazole,

DIEA: *N,N*-diisopropylethylamine,

DMAP: 4-dimethylaminopyridine,

NMM: *N*-methylmorpholine,

Tg: 2-(2-(2-methoxyethoxy)ethoxy)ethyl,

Tfa: trifluoroacetyl,

Z: benzyloxycarbonyl.

### General Procedures for the Peptide Syntheses.

Boc-, Fmoc-, Z- and Tfa-protecting groups were removed by treatment with HCO<sub>2</sub>H or 4N HCl in 1,4-dioxane, 20% piperidine in DMF, 10% Pd-C/H<sub>2</sub> in MeOH and NaBH<sub>4</sub> in EtOH, respectively. The N-deprotected peptide formic acid salt was neutralized with aqueous 5% NaHCO<sub>3</sub>. The resulting N-deprotected peptide and N-deprotected peptide hydrochloride salts were used without further purification unless otherwise noted. Peptide coupling reactions were carried out by HOAt/HATU, HOAt/EDC·HCl or HOBt·H<sub>2</sub>O/EDC·HCl methods.



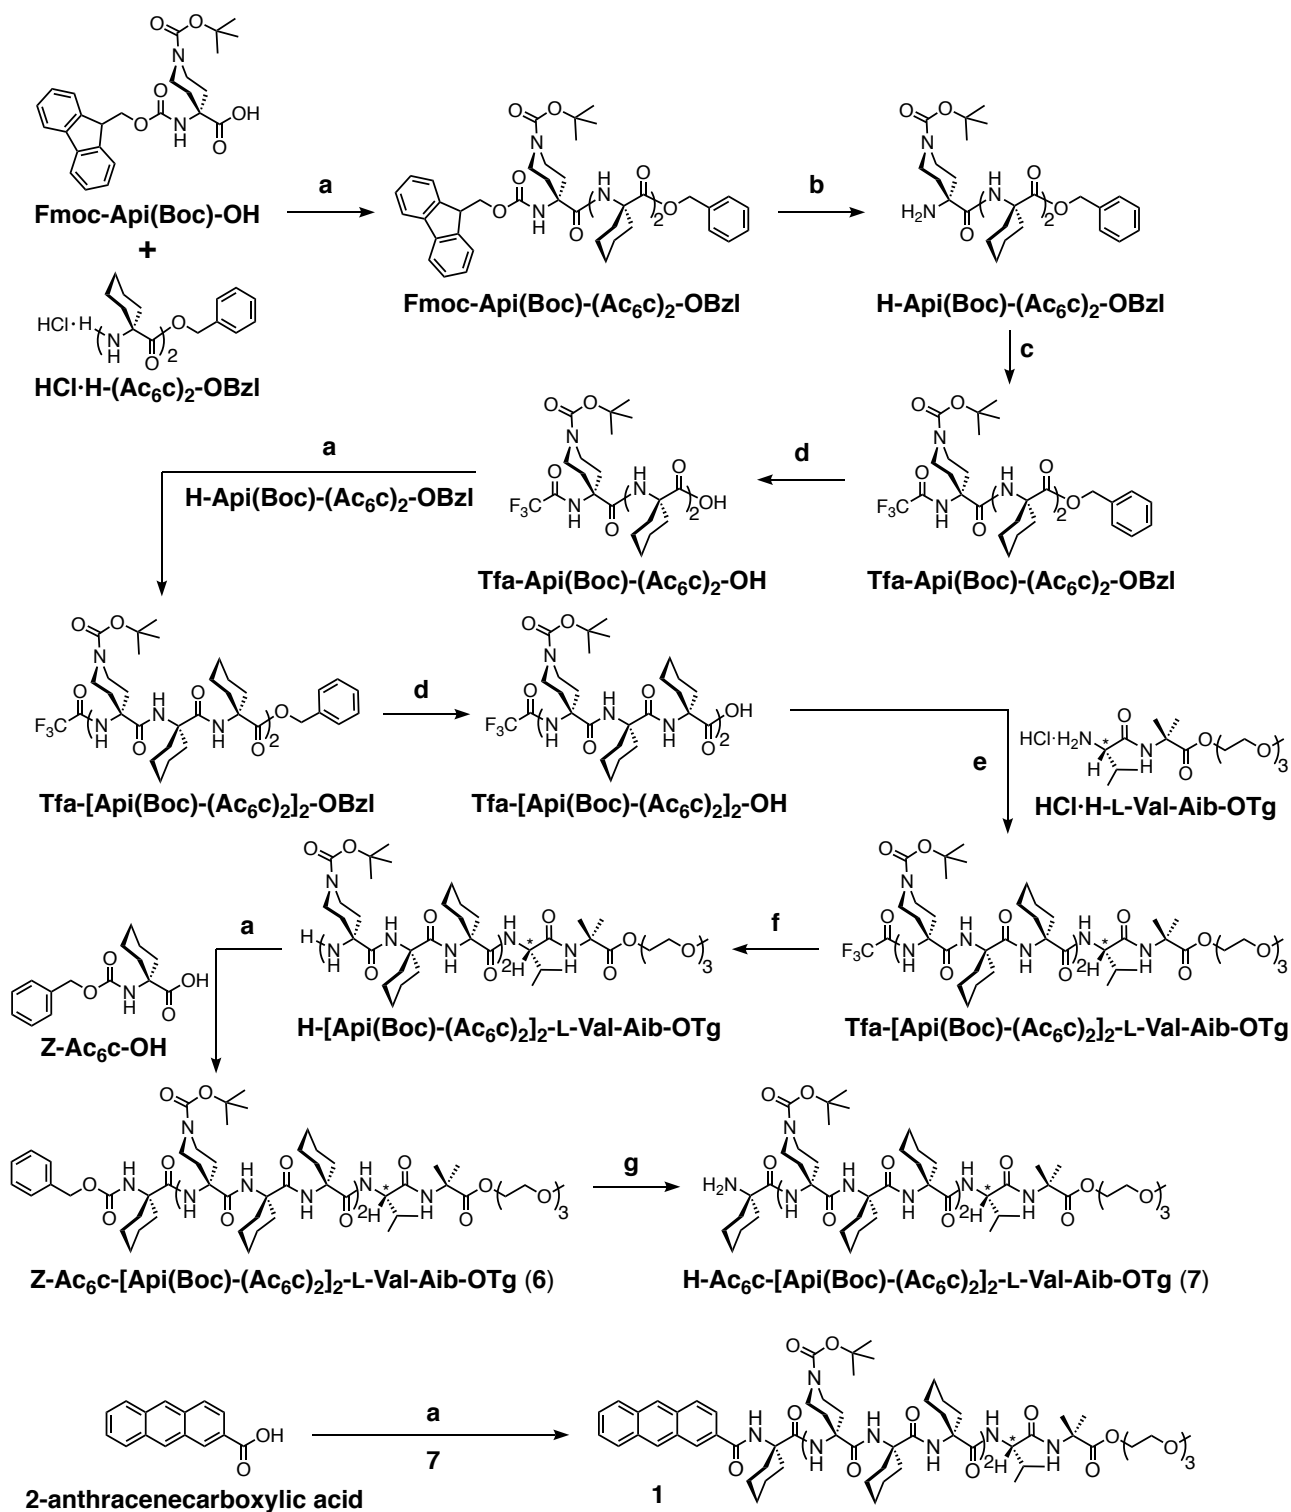

**Scheme S1.** Synthesis of the peptide-bound 2-substituted anthracene derivative **1**. Reagents and conditions: (a) HOAt, HATU, CH<sub>2</sub>Cl<sub>2</sub>, 0 °C to rt. (b) 20% piperidine in DMF, rt. (c) Trifluoroacetic anhydride, Et<sub>3</sub>N, DMAP, CH<sub>2</sub>Cl<sub>2</sub>, rt. (d) 10% Pd-C/H<sub>2</sub>, THF/H<sub>2</sub>O, rt. (e) HOAt, EDC·HCl, DMF, 0 °C to rt. (f) NaBH<sub>4</sub>, EtOH, 0 °C. (g) 10% Pd-C/H<sub>2</sub>, MeOH, rt.

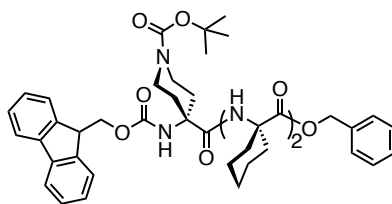

**Fmoc-Api(Boc)-(Ac<sub>6</sub>c)<sub>2</sub>-OBzl**

**Fmoc-Api(Boc)-(Ac<sub>6</sub>c)<sub>2</sub>-OBzl.** To a suspension of Fmoc-Api(Boc)-OH<sup>S1</sup> (1.70 g, 3.64 mmol) and HOAt (250 mg, 1.82 mmol) in dry CH<sub>2</sub>Cl<sub>2</sub> (12 mL) were added HATU (1.38 g, 3.64 mmol) and DIEA (635  $\mu$ L, 3.64 mmol) at 0 °C under Ar with stirring. After 1 h, to this was added HCl·H-(Ac<sub>6</sub>c)<sub>2</sub>-OBzl (2.13 g, 5.47 mmol), which had been obtained by treatment of Boc-(Ac<sub>6</sub>c)<sub>2</sub>-OBzl<sup>S2</sup> with 4N HCl in 1,4-dioxane, and DIEA (950  $\mu$ L, 5.47 mmol). The reaction mixture was stirred at 0 °C for 2 h and further at room temperature for 65 h under Ar. The solution was then diluted with CHCl<sub>3</sub>, and the mixture was washed with 1N aqueous HCl, 5% aqueous NaHCO<sub>3</sub> and brine, dried over MgSO<sub>4</sub>, filtered and concentrated under reduced pressure. The residue was purified by column chromatography (SiO<sub>2</sub>, CHCl<sub>3</sub>/EtOAc (2/1, v/v)) and further by reprecipitation from Et<sub>2</sub>O/*n*-hexane (1/3, v/v), affording Fmoc-Api(Boc)-(Ac<sub>6</sub>c)<sub>2</sub>-OBzl (2.22 g, 75.3%) as a white solid. Mp: 174–177 °C. IR (KBr, cm<sup>-1</sup>): 1734 ( $\nu_{C=O}$ ), 1698 ( $\nu_{C=O}$ ), 1689 ( $\nu_{C=O}$ ), 1519 ( $\nu_{N-H}$ ). <sup>1</sup>H NMR (500 MHz, CDCl<sub>3</sub>, 25 °C):  $\delta$  7.79 (d,  $J$  = 7.6 Hz, 2H, ArH), 7.55–7.54 (m, 3H, ArH, NH), 7.42 (t,  $J$  = 7.5 Hz, 2H, ArH), 7.35–7.32 (m, 2H, ArH), 7.26–7.15 (m, partially overlapping with CHCl<sub>3</sub> signal), 6.19 (s, 1H, NH), 5.03 (s, 2H, CH<sub>2</sub>), 4.70 (s, 1H, NH), 4.57 (d,  $J$  = 5.1 Hz, 2H, CH<sub>2</sub>), 4.19 (t,  $J$  = 5.6 Hz, 1H, CH<sub>2</sub>), 3.79 (br, 2H, CH<sub>2</sub>), 2.75 (br, 2H, CH<sub>2</sub>), 2.08–1.22 (m, partially overlapping with H<sub>2</sub>O signal). <sup>13</sup>C NMR (126 MHz, CDCl<sub>3</sub>, 25 °C):  $\delta$  174.20, 173.14, 172.86, 155.06, 154.51, 143.38, 141.48, 136.41, 128.56, 128.35, 127.98, 127.96, 127.23, 124.54, 120.18, 79.99, 66.64, 66.44, 60.19, 58.73, 58.43, 47.26, 32.26, 31.88, 28.40, 25.29, 25.11, 21.37, 21.32. HRMS (ESI<sup>+</sup>):  $m/z$  calcd for (M+Na<sup>+</sup>), 829.4152; found, 829.4125.

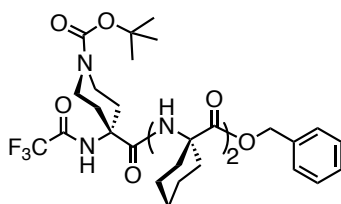

**Tfa-Api(Boc)-(Ac<sub>6</sub>c)<sub>2</sub>-OBzl**

**Tfa-Api(Boc)-(Ac<sub>6</sub>c)<sub>2</sub>-OBzl.** To a solution of H-Api(Boc)-(Ac<sub>6</sub>c)<sub>2</sub>-OBzl (381 mg, 0.650 mmol), which had been obtained by treatment of Fmoc-Api(Boc)-(Ac<sub>6</sub>c)<sub>2</sub>-OBzl with 20% piperidine in DMF, in dry CH<sub>2</sub>Cl<sub>2</sub> (11 mL) were added trifluoroacetic anhydride (0.150 mL, 1.06 mmol), Et<sub>3</sub>N (0.150 mL, 1.08 mmol) and DMAP (16.6 mg, 0.136 mmol) at room temperature under Ar with

stirring. The reaction mixture was stirred at room temperature for 2 h. The solution was then diluted with  $\text{CHCl}_3$ , and the mixture was washed with 5% aqueous  $\text{NaHCO}_3$  and brine, dried over  $\text{MgSO}_4$ , filtered and concentrated under reduced pressure. The residue was purified by column chromatography ( $\text{SiO}_2$ ,  $\text{CHCl}_3/\text{EtOAc}$  (3/1, v/v)) and further by reprecipitation from  $\text{Et}_2\text{O}/n$ -hexane (1/5, v/v), affording Tfa-Api(Boc)-(Ac<sub>6</sub>c)<sub>2</sub>-OBzl (298 mg, 67.2%) as a white solid. Mp: 172–174 °C. IR (KBr,  $\text{cm}^{-1}$ ): 1734 ( $\nu_{\text{C=O}}$ ), 1698 ( $\nu_{\text{C=O}}$ ), 1671 ( $\nu_{\text{C=O}}$ ), 1508 ( $\nu_{\text{N-H}}$ ). <sup>1</sup>H NMR (500 MHz,  $\text{CDCl}_3$ , 50 °C):  $\delta$  7.33–7.29 (m, 5H, ArH, NH), 6.43 (s, 1H, NH), 6.13 (s, 1H, NH), 5.08 (s, 2H, CH<sub>2</sub>), 3.83–3.80 (m, 2H, CH<sub>2</sub>), 3.08–3.03 (m, 2H, CH<sub>2</sub>), 2.09–1.97 (m, 8H, CH<sub>2</sub>), 1.84–1.79 (m, 4H, CH<sub>2</sub>), 1.64–1.56 (m, partially overlapping with H<sub>2</sub>O signal), 1.46 (s, 9H, CH<sub>3</sub>), 1.43–1.40 (m, 11H, CH<sub>2</sub>), 1.33–1.23 (m, 4H, CH<sub>2</sub>). <sup>13</sup>C NMR (126 MHz,  $\text{CDCl}_3$ , 50 °C):  $\delta$  173.98, 172.68, 170.98, 157.95, 157.65, 157.35, 157.05, 154.50, 136.50, 128.51, 128.43, 128.05, 118.91, 116.62, 114.32, 112.02, 80.40, 66.76, 60.83, 59.95, 58.95, 39.35, 32.45, 32.21, 31.69, 20.45, 25.28, 25.13, 21.52, 21.46. HRMS (ESI+):  $m/z$  calcd for (M+Na<sup>+</sup>), 703.3295; found, 703.3300.

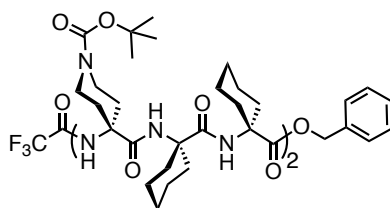

**Tfa-[Api(Boc)-(Ac<sub>6</sub>c)<sub>2</sub>]<sub>2</sub>-OBzl**

**Tfa-[Api(Boc)-(Ac<sub>6</sub>c)<sub>2</sub>]<sub>2</sub>-OBzl.** To a suspension of Tfa-Api(Boc)-(Ac<sub>6</sub>c)<sub>2</sub>-OH (296 mg, 0.507 mmol), which had been obtained by treatment of Tfa-Api(Boc)-(Ac<sub>6</sub>c)<sub>2</sub>-OBzl with 10% Pd-C/H<sub>2</sub> in THF/H<sub>2</sub>O (10/1, v/v), and HOAt (35.2 mg, 0.254 mmol) in dry  $\text{CH}_2\text{Cl}_2$  (2 mL) were added HATU (214 mg, 0.559 mmol) and DIEA (110  $\mu\text{L}$ , 0.615 mmol) at 0 °C under Ar with stirring. After 1 h, to this was added H-Api(Boc)-(Ac<sub>6</sub>c)<sub>2</sub>-OBzl (108 mg, 76.0  $\mu\text{mol}$ ). The reaction mixture was stirred at 0 °C for 1 h and further at room temperature for 134 h under Ar. The solution was then diluted with  $\text{CHCl}_3$ , and the mixture was washed with 1N aqueous HCl, 5% aqueous  $\text{NaHCO}_3$  and brine, dried over  $\text{MgSO}_4$ , filtered and concentrated under reduced pressure. The residue was washed with *n*-hexane, affording Tfa-[Api(Boc)-(Ac<sub>6</sub>c)<sub>2</sub>]<sub>2</sub>-OBzl (519 mg, 89.6%) as a white solid. Mp: 222–223 °C. IR (KBr,  $\text{cm}^{-1}$ ): 1734 ( $\nu_{\text{C=O}}$ ), 1700 ( $\nu_{\text{C=O}}$ ), 1671 ( $\nu_{\text{C=O}}$ ), 1523 ( $\nu_{\text{N-H}}$ ). <sup>1</sup>H NMR (500 MHz,  $\text{CDCl}_3$ , 50 °C):  $\delta$  8.24 (s, 1H, NH), 7.33–7.22 (m, partially overlapping with  $\text{CHCl}_3$  signal), 6.97 (s, 1H, NH), 6.66 (s, 1H, NH), 6.56 (s, 1H, NH), 5.10 (s, 2H, CH<sub>2</sub>), 3.92–3.86 (m, 4H, CH<sub>2</sub>), 3.22–3.18 (t,  $J$  = 11.3 Hz, 2H, CH<sub>2</sub>), 3.01–2.77 (br, 2H, CH<sub>2</sub>), 2.16–1.20 (m, partially overlapping with H<sub>2</sub>O signal). <sup>13</sup>C NMR (126 MHz,  $\text{CDCl}_3$ , 50 °C):  $\delta$  175.04, 174.58, 174.56, 173.19, 173.13, 171.92, 158.59, 158.29, 155.30, 154.48, 136.78, 128.26, 127.96, 127.62, 116.62, 114.33, 80.61, 79.76, 66.22, 60.78,

59.87, 59.84, 59.15, 59.09, 58.43, 39.40, 32.68, 28.50, 28.45, 25.66, 25.64, 25.22, 25.02, 21.79, 21.72, 21.65, 21.50. HRMS (ESI<sup>+</sup>): *m/z* calcd for (M+Na<sup>+</sup>), 1179.6293; found, 1179.6269.

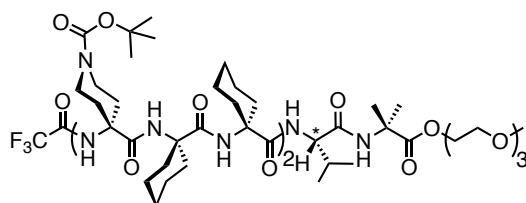

**Tfa-[Api(Boc)-(Ac<sub>6</sub>c)<sub>2</sub>]<sub>2</sub>-L-Val-Aib-OTg**

**Tfa-[Api(Boc)-(Ac<sub>6</sub>c)<sub>2</sub>]<sub>2</sub>-L-Val-Aib-OTg.** To a suspension of Tfa-[Api(Boc)-(Ac<sub>6</sub>c)<sub>2</sub>]<sub>2</sub>-OH (352 mg, 0.328 mmol) and HCl·H-L-Val-Aib-OTg (158 mg, 0.394 mmol), which had been obtained by treatments of Tfa-[Api(Boc)-(Ac<sub>6</sub>c)<sub>2</sub>]<sub>2</sub>-OBzl with 10% Pd-C/H<sub>2</sub> in THF/H<sub>2</sub>O (10/1, v/v) and Boc-L-Val-Aib-OTg<sup>S2</sup> with 4N HCl in 1,4-dioxane, respectively, and HOAt (51.6 mg, 0.377 mmol) in dry DMF (4 mL) was added EDC·HCl (66.8 mg, 0.328 mmol) at 0 °C under Ar with stirring. After 1 h, to this was added NMM (47.0 μL, 0.410 mmol) at 0 °C under Ar with stirring. The reaction mixture was stirred at 0 °C for 2.5 h and further at room temperature for 20 h under Ar. The solution was then diluted with CHCl<sub>3</sub>, and the mixture was washed with 1N aqueous HCl, 5% aqueous NaHCO<sub>3</sub> and brine, dried over MgSO<sub>4</sub>, filtered and concentrated under reduced pressure. The residue was washed with Et<sub>2</sub>O/*n*-hexane (1/4, v/v), affording Tfa-[Api(Boc)-(Ac<sub>6</sub>c)<sub>2</sub>]<sub>2</sub>-L-Val-Aib-OTg (454 mg, 98.5%) as a white solid. Mp: 145–147 °C. IR (KBr, cm<sup>-1</sup>): 1735 (ν<sub>C=O</sub>), 1700 (ν<sub>C=O</sub>), 1663 (ν<sub>C=O</sub>), 1523 (ν<sub>N-H</sub>). <sup>1</sup>H NMR (500 MHz, CDCl<sub>3</sub>, 25 °C): δ 7.98 (s, 1H, NH), 7.30–7.25 (m, partially overlapping with CHCl<sub>3</sub> signal), 7.02 (s, 1H, NH), 6.75 (s, 1H, NH), 6.64 (s, 1H, NH), 4.28–4.17 (m, 3H, OCH<sub>2</sub>, CH<sub>2</sub>), 3.86 (m, 4H, CH<sub>2</sub>), 3.70–3.61 (m, 8H, OCH<sub>2</sub>), 3.54–3.52 (m, 2H, OCH<sub>2</sub>), 3.36 (s, 3H, OCH<sub>3</sub>), 3.26–3.20 (m, 2H, CH<sub>2</sub>), 3.12 (t, *J* = 11.0 Hz, 1H, CH<sub>2</sub>), 2.78 (t, 1H, *J* = 12.0 Hz, CH<sub>2</sub>), 2.51–2.49 (m, 1H, CH<sub>2</sub>), 2.42–2.35 (m, 1H, CH<sub>2</sub>), 2.25–1.20 (m, partially overlapping with H<sub>2</sub>O signal), 0.98 (dd, *J* = 20.6, 6.8 Hz, 6H, CH<sub>3</sub>). <sup>13</sup>C NMR (126 MHz, CDCl<sub>3</sub>, 50 °C): δ 176.19, 175.79, 175.42, 174.95, 174.41, 174.07, 172.87, 172.16, 158.76, 158.46, 155.02, 154.62, 116.72, 114.43, 80.24, 79.81, 72.10, 70.75, 70.63, 69.05, 63.90, 61.13, 60.37, 60.00, 59.81, 59.33, 59.17, 58.98, 57.65, 56.07, 39.82, 39.47, 34.60, 31.45, 29.86, 29.23, 28.54, 28.49, 25.71, 25.55, 25.26, 24.42, 22.15, 21.97, 21.81, 21.56, 21.42, 19.42, 19.35. HRMS (ESI<sup>+</sup>): *m/z* calcd for (M+Na<sup>+</sup>), 1419.7978; found, 1419.7982.

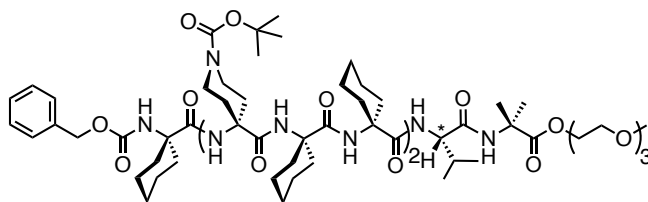

**Z-Ac<sub>6</sub>c-[Api(Boc)-(Ac<sub>6</sub>c)<sub>2</sub>]<sub>2</sub>-L-Val-Aib-OTg (6)**

**Z-Ac<sub>6</sub>c-[Api(Boc)-(Ac<sub>6</sub>c)<sub>2</sub>]<sub>2</sub>-L-Val-Aib-OTg (6).** To a suspension of Z-Ac<sub>6</sub>c-OH<sup>S3</sup> (72.8 mg, 0.265 mmol) and HOAt (12.9 mg, 88.3 μmol) in dry CH<sub>2</sub>Cl<sub>2</sub> (1 mL) were added HATU (74.1 mg, 0.194 mmol) and DIEA (37.0 μL, 0.214 mmol) at 0 °C under Ar with stirring. After 1.5 h, to this was added H-[Api(Boc)-(Ac<sub>6</sub>c)<sub>2</sub>]<sub>2</sub>-L-Val-Aib-OTg (218 mg, 0.177 mmol), which had been obtained by treatment of Tfa-[Api(Boc)-(Ac<sub>6</sub>c)<sub>2</sub>]<sub>2</sub>-L-Val-Aib-OTg with NaBH<sub>4</sub> in EtOH, at 0 °C under Ar with stirring. The reaction mixture was stirred at 0 °C for 2 h and further at room temperature for 67 h under Ar. The solution was then diluted with CHCl<sub>3</sub>, and the mixture was washed with 1N aqueous HCl, 5% aqueous NaHCO<sub>3</sub> and brine, dried over MgSO<sub>4</sub>, filtered and concentrated under reduced pressure. The residue was purified by column chromatography (SiO<sub>2</sub>, CHCl<sub>3</sub>/EtOAc/MeOH (5/4/1, v/v/v)) and further by recrystallization from CHCl<sub>3</sub>/Et<sub>2</sub>O (1/12, v/v), affording Z-Ac<sub>6</sub>c-[Api(Boc)-(Ac<sub>6</sub>c)<sub>2</sub>]<sub>2</sub>-L-Val-Aib-OTg (**6**) (239 mg, 91.3%) as a white solid. Mp: 137–140 °C. IR (KBr, cm<sup>-1</sup>): 1736 (ν<sub>C=O</sub>), 1699 (ν<sub>C=O</sub>), 1662 (ν<sub>C=O</sub>), 1523 (ν<sub>N-H</sub>). <sup>1</sup>H NMR (500 MHz, CDCl<sub>3</sub>, 50 °C): δ 7.39–7.29 (m, 9H, ArH, NH), 7.14 (s, 1H, NH), 7.06 (s, 1H, NH), 7.05 (s, 1H, NH), 6.79 (s, 1H, NH), 5.90 (s, 1H, NH), 5.15 (dd, *J* = 36.8, 12.6 Hz, 2H, CH<sub>2</sub>), 4.29–4.16 (m, 3H, CH<sub>2</sub>), 3.87–3.76 (m, 4H, CH<sub>2</sub>), 3.69–3.61 (m, 8H, CH<sub>2</sub>), 3.54–3.52 (m, 2H, CH<sub>2</sub>), 3.36 (s, 3H, OCH<sub>3</sub>), 3.23 (t, *J* = 12.2 Hz, 1H, CH<sub>2</sub>), 3.07 (t, *J* = 11.0 Hz, 1H, CH<sub>2</sub>), 2.96 (t, *J* = 10.7 Hz, 1H, CH<sub>2</sub>), 2.87 (t, *J* = 11.4 Hz, 1H, CH<sub>2</sub>), 2.52–2.49 (m, 1H, CH<sub>2</sub>), 2.41–2.35 (m, 1H, CH), 2.20–1.14 (m, partially overlapping with H<sub>2</sub>O signal), 0.98 (dd, *J* = 23.9, 6.9 Hz, 6H, CH<sub>3</sub>). <sup>13</sup>C NMR (126 MHz, CDCl<sub>3</sub>, 50 °C): δ 176.20, 175.80, 175.62, 175.37, 175.31, 174.82, 174.60, 174.01, 171.94, 156.32, 154.85, 154.64, 136.64, 128.68, 128.28, 127.26, 80.00, 79.52, 72.06, 70.71, 70.56, 69.04, 66.84, 63.88, 60.40, 60.11, 60.00, 59.80, 59.48, 59.34, 58.96, 57.73, 57.30, 55.85, 39.82, 39.16, 34.81, 29.67, 28.55, 28.47, 25.70, 25.56, 25.50, 25.34, 25.09, 24.59, 22.09, 22.02, 21.92, 21.77, 21.61, 21.56, 21.46, 19.49, 18.92. HRMS (ESI<sup>+</sup>): *m/z* calcd for (M+Na<sup>+</sup>), 1583.9395; found, 1583.9353.

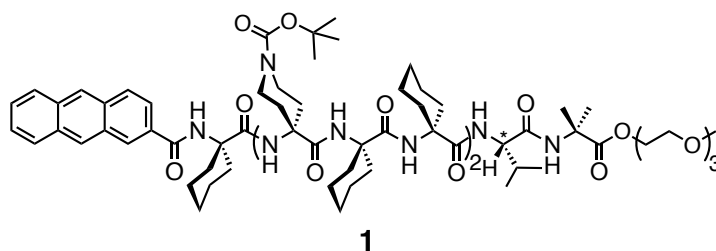

**1.** To a suspension of 2-anthracenecarboxylic acid (23.7 mg, 0.107 mmol) and HOAt (7.36 mg, 54.1  $\mu$ mol) in dry  $\text{CH}_2\text{Cl}_2$  (2 mL) were added HATU (45.1 mg, 0.119 mmol) and DIEA (22.0  $\mu$ L, 0.126 mmol) at 0  $^\circ\text{C}$  under Ar with stirring. After 2 h, to this was added H-Ac<sub>6</sub>c-[Api(Boc)-(Ac<sub>6</sub>c)<sub>2</sub>]-L-Val-Aib-OTg (**7**) (108 mg, 76.0  $\mu$ mol), which had been obtained by treatment of Z-Ac<sub>6</sub>c-[Api(Boc)-(Ac<sub>6</sub>c)<sub>2</sub>]-L-Val-Aib-OTg (**6**) with 10% Pd-C/H<sub>2</sub> in MeOH. The reaction mixture was stirred at 0  $^\circ\text{C}$  for 2 h and further at room temperature for 88 h under Ar. The solution was then diluted with  $\text{CHCl}_3$ , and the mixture was washed with 1N aqueous HCl, 5% aqueous  $\text{NaHCO}_3$  and brine, dried over  $\text{MgSO}_4$ , filtered and concentrated under reduced pressure. The residue was purified by column chromatography ( $\text{SiO}_2$ ,  $\text{CHCl}_3/\text{MeOH}$  (9/1, v/v) and EtOAc), affording **1** (98.7 mg, 79.7%) as a pale yellow solid. Mp: 157–159  $^\circ\text{C}$ . IR (KBr,  $\text{cm}^{-1}$ ): 1736 ( $\nu_{\text{C=O}}$ ), 1661 ( $\nu_{\text{C=O}}$ ), 1523 ( $\nu_{\text{N-H}}$ ).  $^1\text{H}$  NMR (500 MHz,  $\text{CDCl}_3$ , 25  $^\circ\text{C}$ ):  $\delta$  8.58 (s, 1H, ArH), 8.53 (s, 1H ArH), 8.51 (s, 1H ArH), 8.13 (d,  $J$  = 9.0 Hz, 1H, ArH), 8.08–8.06 (m, 2H, ArH), 7.75 (dd,  $J$  = 8.9, 1.7 Hz, 1H, ArH), 7.61–7.55 (m, 2H, ArH), 7.52 (s, 1H, NH), 7.39 (s, 1H, NH), 7.36 (s, 1H, NH), 7.30 (m, partially overlapping with  $\text{CHCl}_3$  signal), 7.18 (s, 1H, NH), 7.06 (s, 1H, NH), 6.90 (s, 1H, NH), 6.68 (s, 1H, NH), 4.30–4.18 (m, 3H,  $\text{OCH}_2$ , CH), 3.95–3.92 (m, 4H,  $\text{CH}_2$ ), 3.70–3.63 (m, 8H,  $\text{OCH}_2$ ), 3.55–3.53 (m, 2H,  $\text{OCH}_2$ ), 3.37 (s, 3H,  $\text{OCH}_3$ ), 3.27 (br s, 1H,  $\text{CH}_2$ ), 3.10 (t,  $J$  = 12 Hz, 1H,  $\text{CH}_2$ ), 2.98 (m, 1H,  $\text{CH}_2$ ), 2.84 (br s, 1H,  $\text{CH}_2$ ), 2.52–2.49 (m, 1H,  $\text{CH}_2$ ), 2.45–2.41 (m, 1H,  $\text{CH}_2$ ), 2.21–1.13 (m, partially overlapping with  $\text{H}_2\text{O}$  signal), 0.98 (dd,  $J$  = 33.0, 6.9 Hz, 6H,  $\text{CH}_3$ ).  $^{13}\text{C}$  NMR (126 MHz,  $\text{CDCl}_3$ , 25  $^\circ\text{C}$ ):  $\delta$  176.28, 175.90, 175.79, 175.64, 174.97, 174.77, 174.66, 174.12, 171.82, 168.00, 154.86, 154.58, 133.10, 132.28, 132.25, 130.21, 129.57, 129.44, 129.27, 128.55, 128.45, 128.23, 126.75, 126.42, 126.18, 122.50, 122.30, 79.97, 79.53, 71.89, 70.56, 70.50, 70.43, 68.82, 63.85, 60.22, 59.84, 59.40, 58.99, 57.56, 57.40, 55.70, 39.70, 35.21, 34.13, 31.59, 29.46, 28.50, 28.40, 25.57, 25.38, 25.24, 25.15, 24.41, 22.66, 22.22, 21.90, 21.66, 21.33, 19.47, 18.75, 14.12. HRMS (ESI<sup>+</sup>):  $m/z$  calcd for ( $\text{M}+\text{Na}^+$ ), 1652.9571; found, 1652.9584.

### 3. General Procedures for Photodimerization of **1**.

A typical experimental procedure is described below. Stock solutions of **1** (0.20 mM; solution I) and 1,1,2,2-tetrachloroethane (0.20 mM; solution II) in CD<sub>3</sub>CN were prepared. An aliquot of solution I (0.15 μmol, 750 μL) was added into a Teflon-valved NMR tube (5-mm (i.d.)) by a syringe. After the solvent was removed under reduced pressure, to this was added an aliquot of solution II (0.15 μmol, 750 μL) by a syringe. The solution was degassed five times by means of freeze-pump out-thaw (nitrogen) cycles, and then irradiated with light (> 400 nm) at 25 °C for 120 min under nitrogen using a cut-off filter. The reaction progress was monitored by <sup>1</sup>H NMR spectroscopy (Fig. S5a). The conversion of **1** was determined by <sup>1</sup>H NMR spectroscopy (Fig. S5a,b). In the same way, the photodimerizations of **1** were performed in degassed CD<sub>3</sub>CN (0.20 mM and 1.0 mM) at various temperatures (Figs. S4 and S6–S11). The relative yields of four stereoisomers (*anti*-HT-**2**, *syn*-HT-**3**, *anti*-HH-**4** and *syn*-HH-**5**) and the diastereoselectivity (diastereomeric excess (de)) of *syn*-HT-**3** and *anti*-HH-**4** photodimers were determined by HPLC analyses (see below).

### 4. Isolation of Stereoisomers and Diastereomers, and Structure Determination.

The four stereoisomers obtained after photoirradiation (> 400 nm) of **1** (0.20 mM) in degassed CD<sub>3</sub>CN at 25 °C (Fig. S5a) were first separated into five fractions (fr.1–fr.5) by HPLC fractionation (Fig. 2a) (HPLC conditions: column, COSMOSIL 5C<sub>18</sub>-MS-II (0.46 (i.d.) × 25 cm); eluent, CH<sub>3</sub>CN/CH<sub>3</sub>OH (75/25 (v/v)); flow rate, 1.0 mL/min; column temperature, 25 °C; detection, UV absorption at 254 nm and CD at 300 nm.). The fr.2 was a mixture of diastereomers ((*P*)-*anti*-HH-**4** and (*M*)-*anti*-HH-**4**), which were then further separated into two fractions (fr.2-1 and fr.2-2) by HPLC fractionation (Fig. 2b) (HPLC conditions: column, COSMOSIL 5C<sub>18</sub>-MS-II (0.46 (i.d.) × 25 cm); eluent, CH<sub>3</sub>OH/H<sub>2</sub>O (95/5 (v/v)); flow rate, 1.0 mL/min; column temperature, 25 °C; detection, UV absorption at 254 nm and CD at 300 nm.). The <sup>1</sup>H NMR spectra of the isolated photodimers are shown in Fig. S1. The absolute configurations of the two chiral photodimers (*syn*-HT-**3** and *anti*-HH-**4**) were determined based on their CD spectra measured in CH<sub>3</sub>OH by comparing the calculated ones of the corresponding chiral photodimers of 2-anthracenecarboxylic acid reported by Inoue and co-workers.<sup>S4</sup> The positive-mode MALDI-TOF-MS spectra of the separated fractions (fr.1, fr.2-1, fr.4 and fr.5) also showed molecular ionic peaks at *m/z* = 3282.82 – 3282.93 ([C<sub>176</sub>H<sub>262</sub>N<sub>22</sub>O<sub>36</sub> + Na]<sup>+</sup>), indicating the formation of cyclophotodimers (Fig. S2).

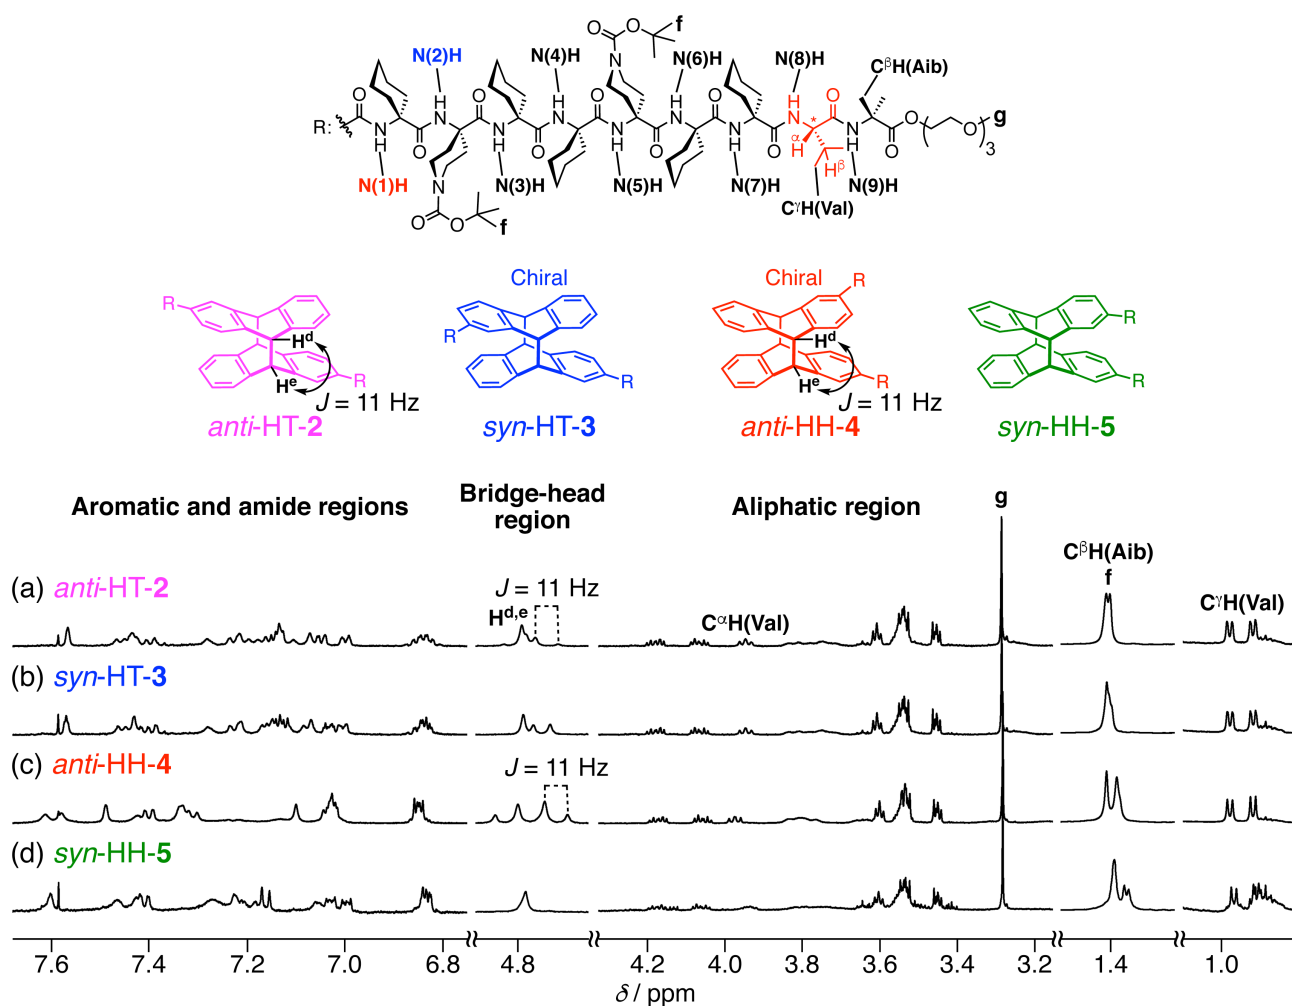

**Fig. S1** Partial <sup>1</sup>H NMR spectra (500 MHz, CD<sub>3</sub>CN, 25 °C) of isolated *anti*-HT-2 (a), *syn*-HT-3 (b), *anti*-HH-4 (c) and *syn*-HH-5 (d).



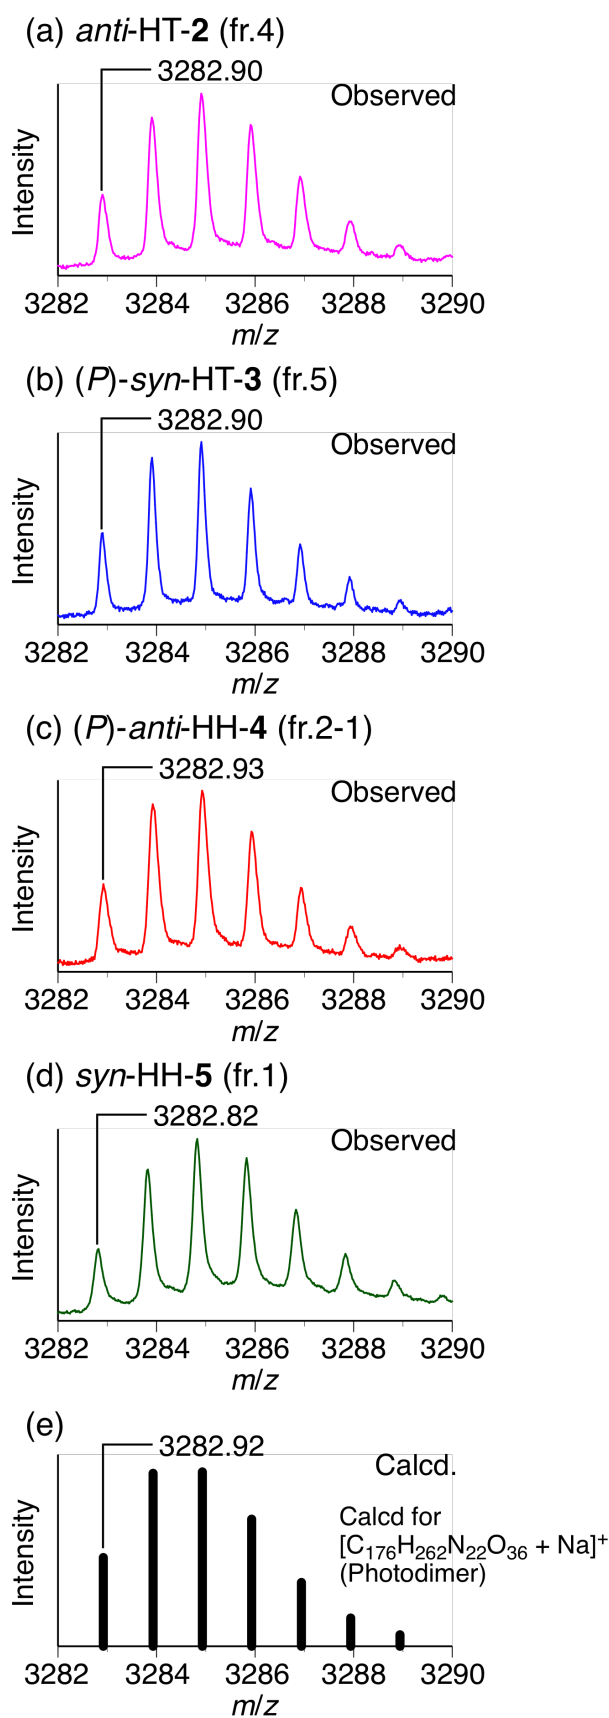

**Fig. S2** Positive-mode MALDI-TOF-MS spectra of *anti*-HT-2 (a), (*P*)-*syn*-HT-3 (b), (*P*)-*anti*-HH-4 (c) and *syn*-HH-5 (d) and their calculated one (e).

## 5. Temperature-Dependent CD and Absorption Spectral Changes of **6** in CH<sub>3</sub>CN.

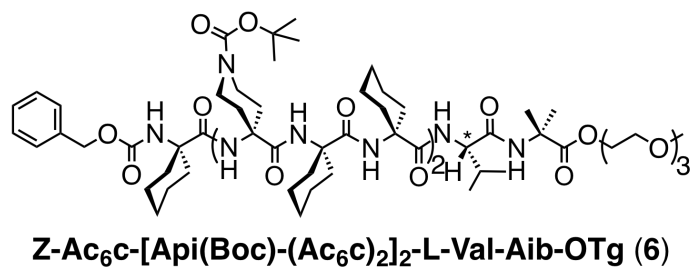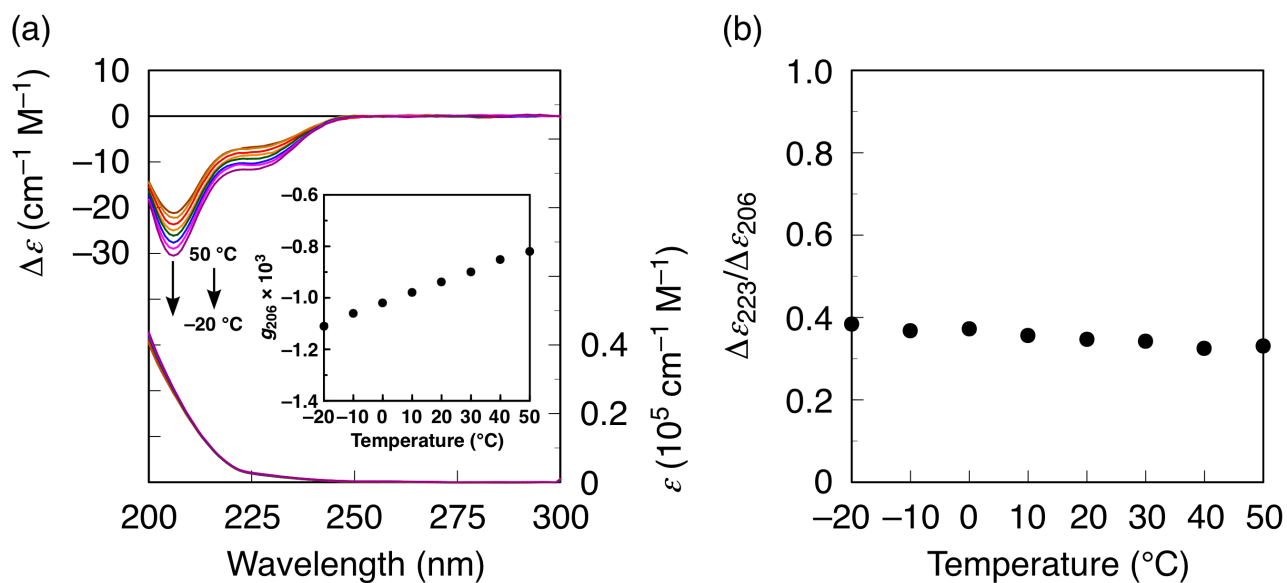

**Fig. S3** (a) Temperature-dependent CD and absorption spectral changes of Z-Ac<sub>6</sub>c-[Api(Boc)-(Ac<sub>6</sub>c)<sub>2</sub>]<sub>2</sub>-L-Val-Aib-OTg (**6**) in CH<sub>3</sub>CN (0.20 mM). Inset shows the plots of the  $g$ -value ( $g_{206} = \Delta\epsilon_{206}/\epsilon_{206}$ ) at 206 nm. (b) Plots of the molar CD ratio at 223 and 206 nm ( $\Delta\epsilon_{223}$  and  $\Delta\epsilon_{206}$ ) of **6** versus temperature.

## 6. Photodimerization of **1** and Its Kinetic Study.

### 6-1. Photodimerization of **1** in Degassed CD<sub>3</sub>CN at Various Temperatures (runs 1–8, Table 1).

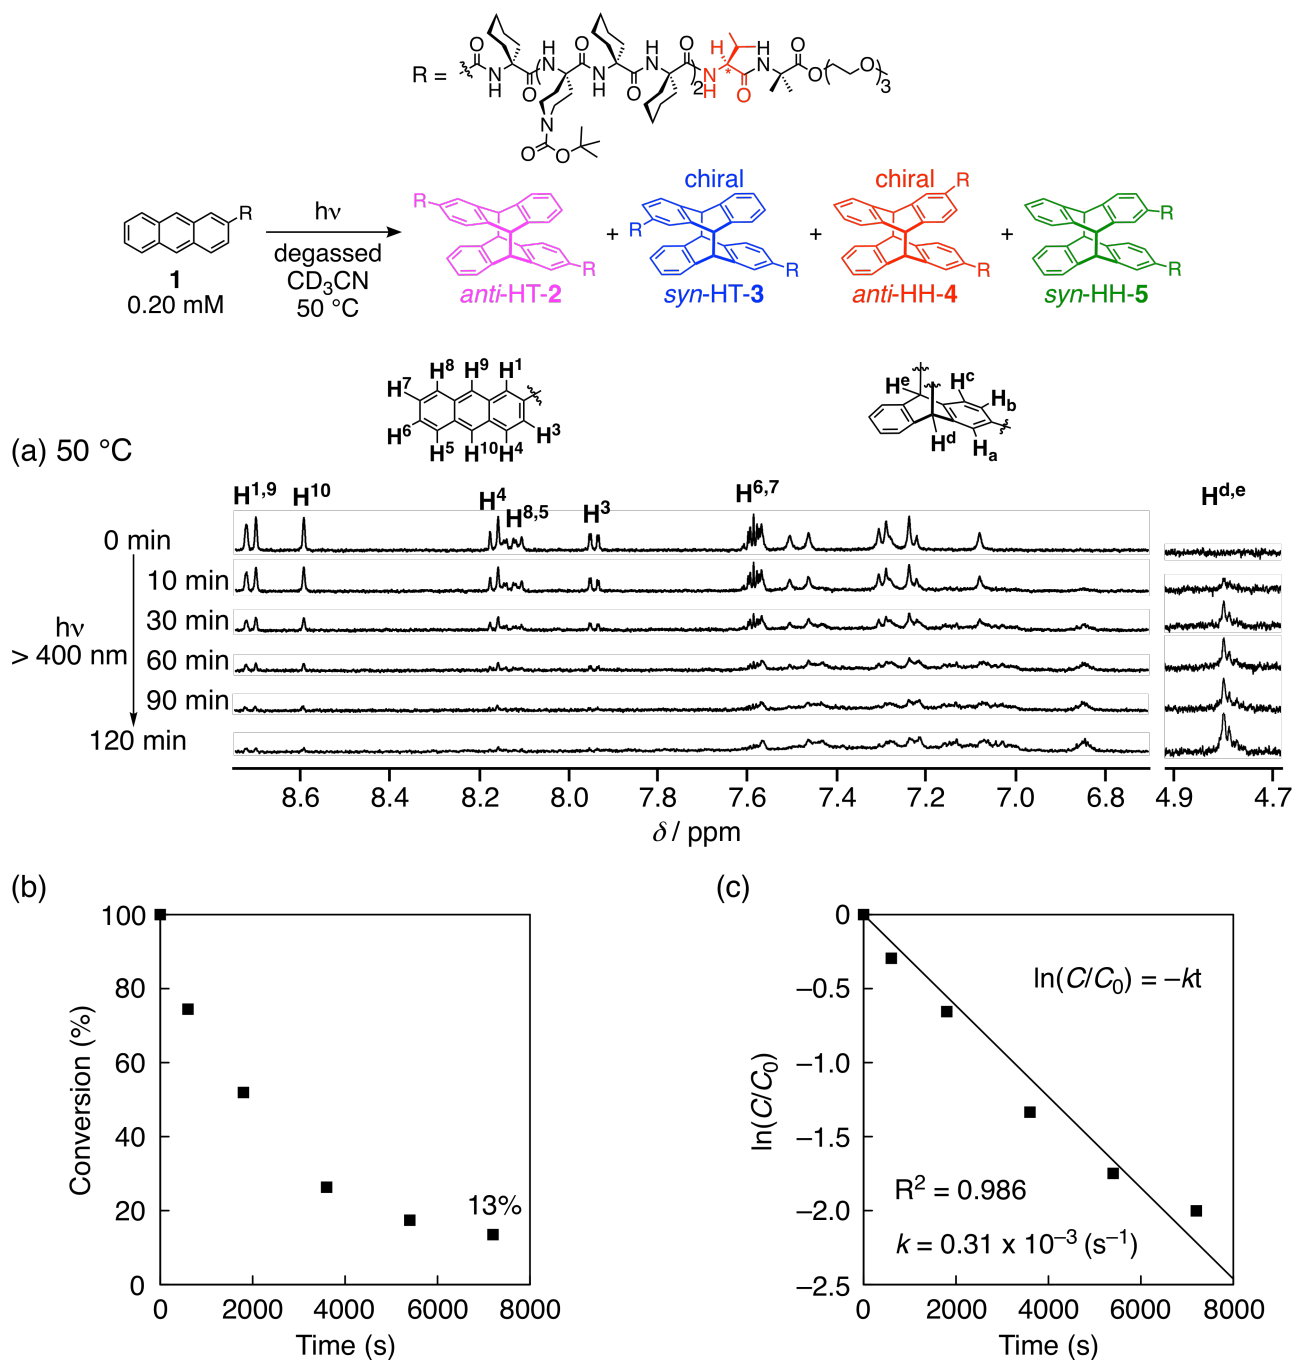

**Fig. S4** (a) Time-dependent <sup>1</sup>H NMR spectral changes of **1** (500 MHz, degassed CD<sub>3</sub>CN, 0.20 mM) upon light irradiation (> 400 nm) at 50 °C (run 1, Table 1) measured at 25 °C. The peak assignments of the anthracene unit were done on the basis of the gCOSY and ROESY (Fig. S14) spectra measured in CD<sub>3</sub>CN. (b,c) Time-conversion relationships (b) and kinetic plots (c) of the photodimerization of **1** (degassed CD<sub>3</sub>CN, 50 °C, 0.20 mM) estimated from the integral ratios of the peaks for H<sup>10</sup> (**1**) and 1,1,2,2-tetrachloroethane used as the internal standard on the basis of the <sup>1</sup>H NMR spectral changes shown in (a).

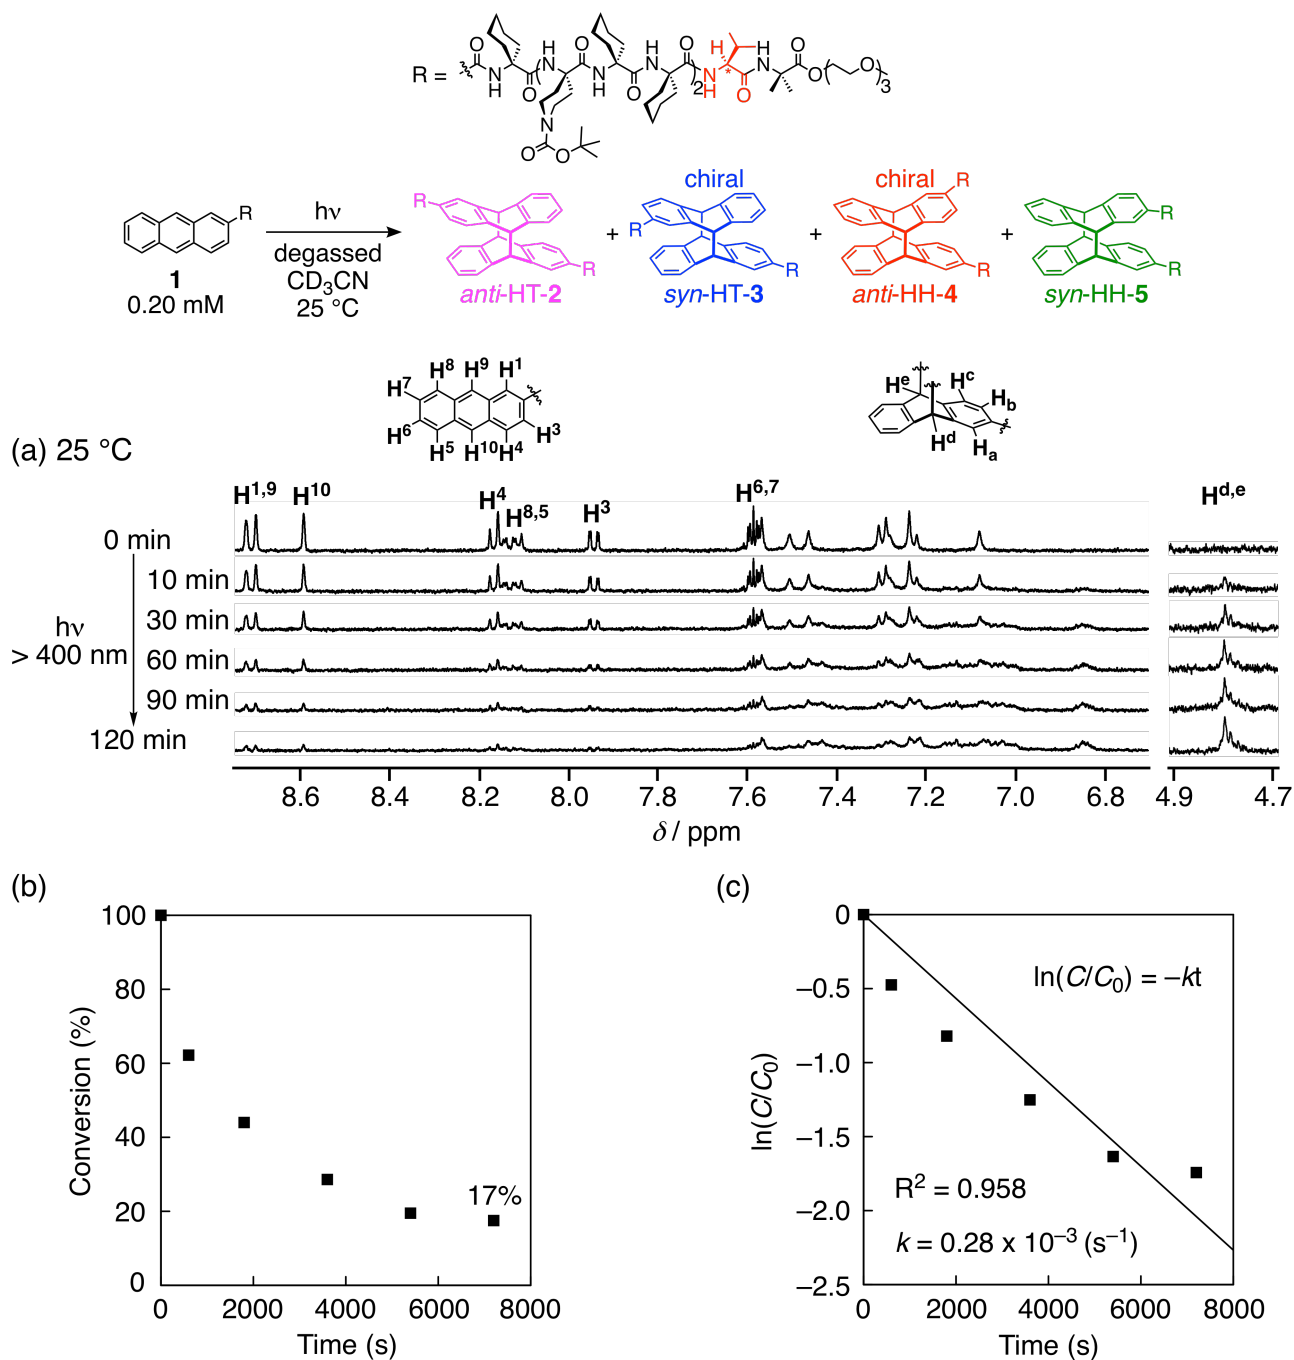

**Fig. S5** (a) Time-dependent  $^1\text{H}$  NMR spectral changes of **1** (500 MHz, degassed  $\text{CD}_3\text{CN}$ , 25  $^\circ\text{C}$ , 0.20 mM) upon light irradiation ( $> 400 \text{ nm}$ ) at 25  $^\circ\text{C}$  (run 2, Table 1). The peak assignments of the anthracene unit were done on the basis of the gCOSY and ROESY (Fig. S14) spectra measured in  $\text{CD}_3\text{CN}$ . (b,c) Time-conversion relationships (b) and kinetic plots (c) of the photodimerization of **1** (degassed  $\text{CD}_3\text{CN}$ , 25  $^\circ\text{C}$ , 0.20 mM) estimated from the integral ratios of the peaks for  $\text{H}^{10}$  (**1**) and 1,1,2,2-tetrachloroethane used as the internal standard on the basis of the  $^1\text{H}$  NMR spectral changes shown in (a).

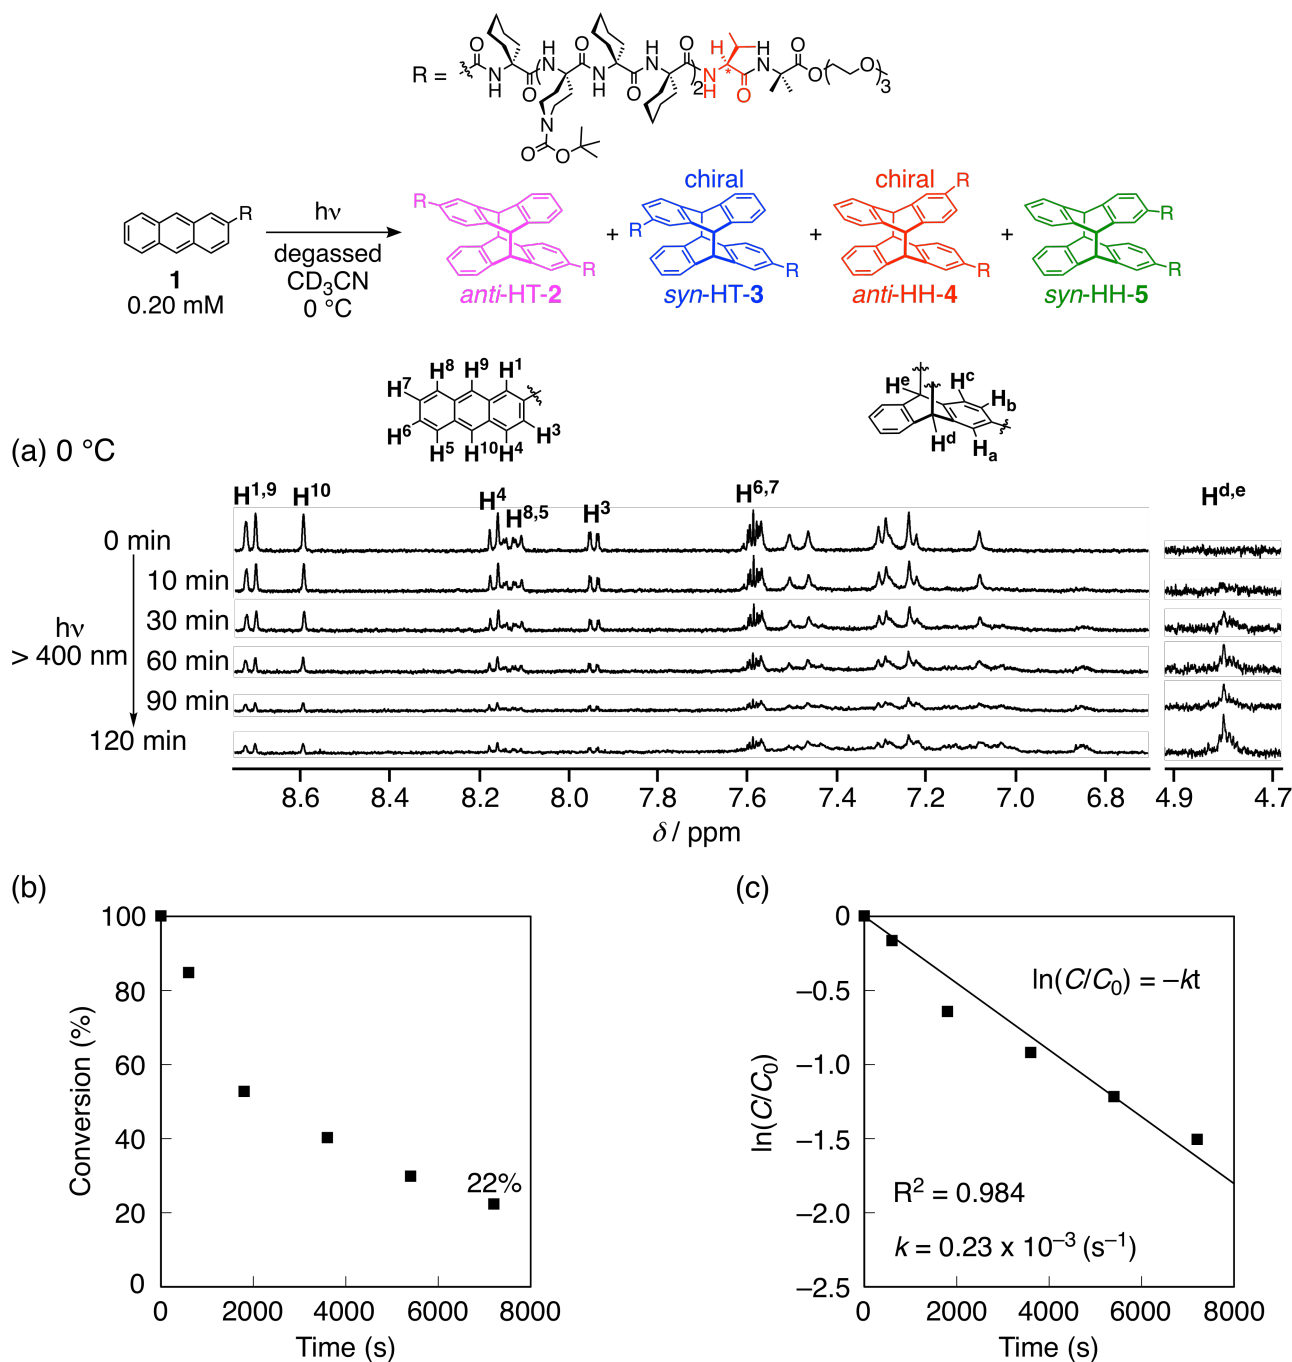

**Fig. S6** (a) Time-dependent  $^1\text{H}$  NMR spectral changes of **1** (500 MHz, degassed  $\text{CD}_3\text{CN}$ , 0.20 mM) upon light irradiation ( $> 400 \text{ nm}$ ) at  $0^\circ\text{C}$  (run 3, Table 1) measured at  $25^\circ\text{C}$ . The peak assignments of the anthracene unit were done on the basis of the gCOSY and ROESY (Fig. S14) spectra measured in  $\text{CD}_3\text{CN}$ . (b,c) Time-conversion relationships (b) and kinetic plots (c) of the photodimerization of **1** (degassed  $\text{CD}_3\text{CN}$ ,  $0^\circ\text{C}$ , 0.20 mM) estimated from the integral ratios of the peaks for  $\text{H}^{10}$  (**1**) and 1,1,2,2-tetrachloroethane used as the internal standard on the basis of the  $^1\text{H}$  NMR spectral changes shown in (a).

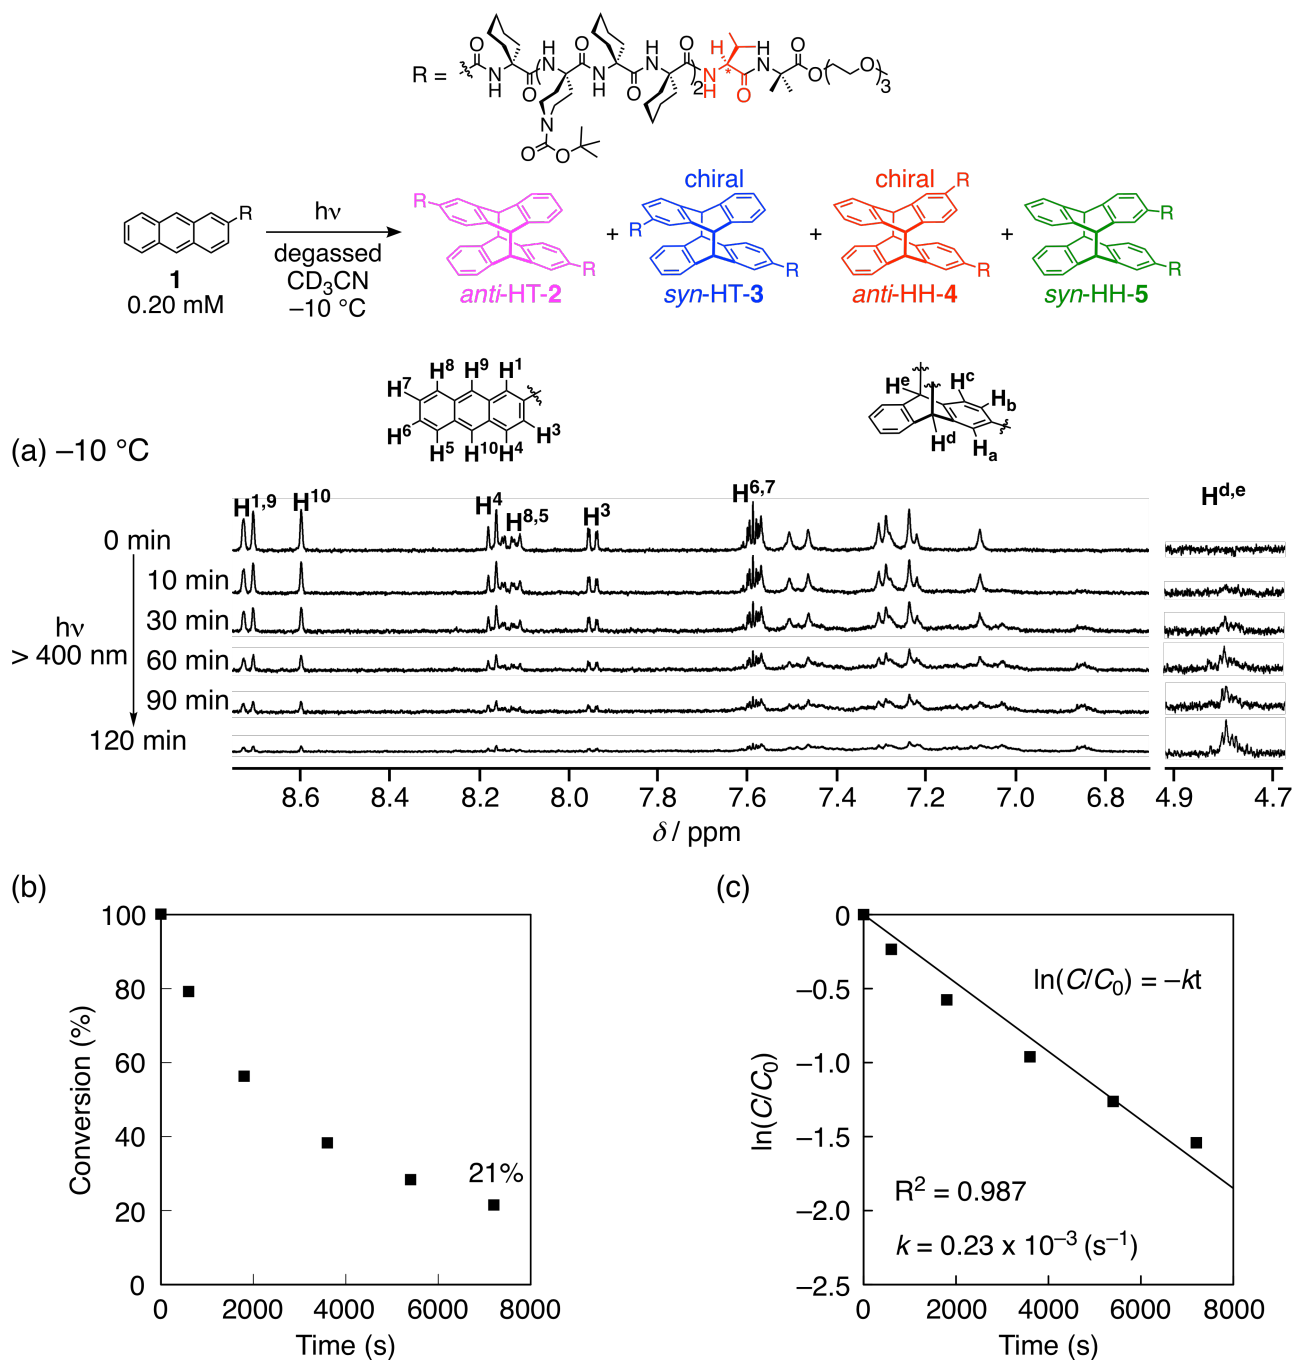

**Fig. S7** (a) Time-dependent  $^1\text{H}$  NMR spectral changes of **1** (500 MHz, degassed  $\text{CD}_3\text{CN}$ , 0.20 mM) upon light irradiation ( $> 400\text{ nm}$ ) at  $-10\text{ }^{\circ}\text{C}$  (run 4, Table 1) measured at  $25\text{ }^{\circ}\text{C}$ . The peak assignments of the anthracene unit were done on the basis of the gCOSY and ROESY (Fig. S14) spectra measured in  $\text{CD}_3\text{CN}$ . (b,c) Time-conversion relationships (b) and kinetic plots (c) of the photodimerization of **1** (degassed  $\text{CD}_3\text{CN}$ ,  $-10\text{ }^{\circ}\text{C}$ , 0.20 mM) estimated from the integral ratios of the peaks for  $\text{H}^{10}$  (**1**) and 1,1,2,2-tetrachloroethane used as the internal standard on the basis of the  $^1\text{H}$  NMR spectral changes shown in (a).

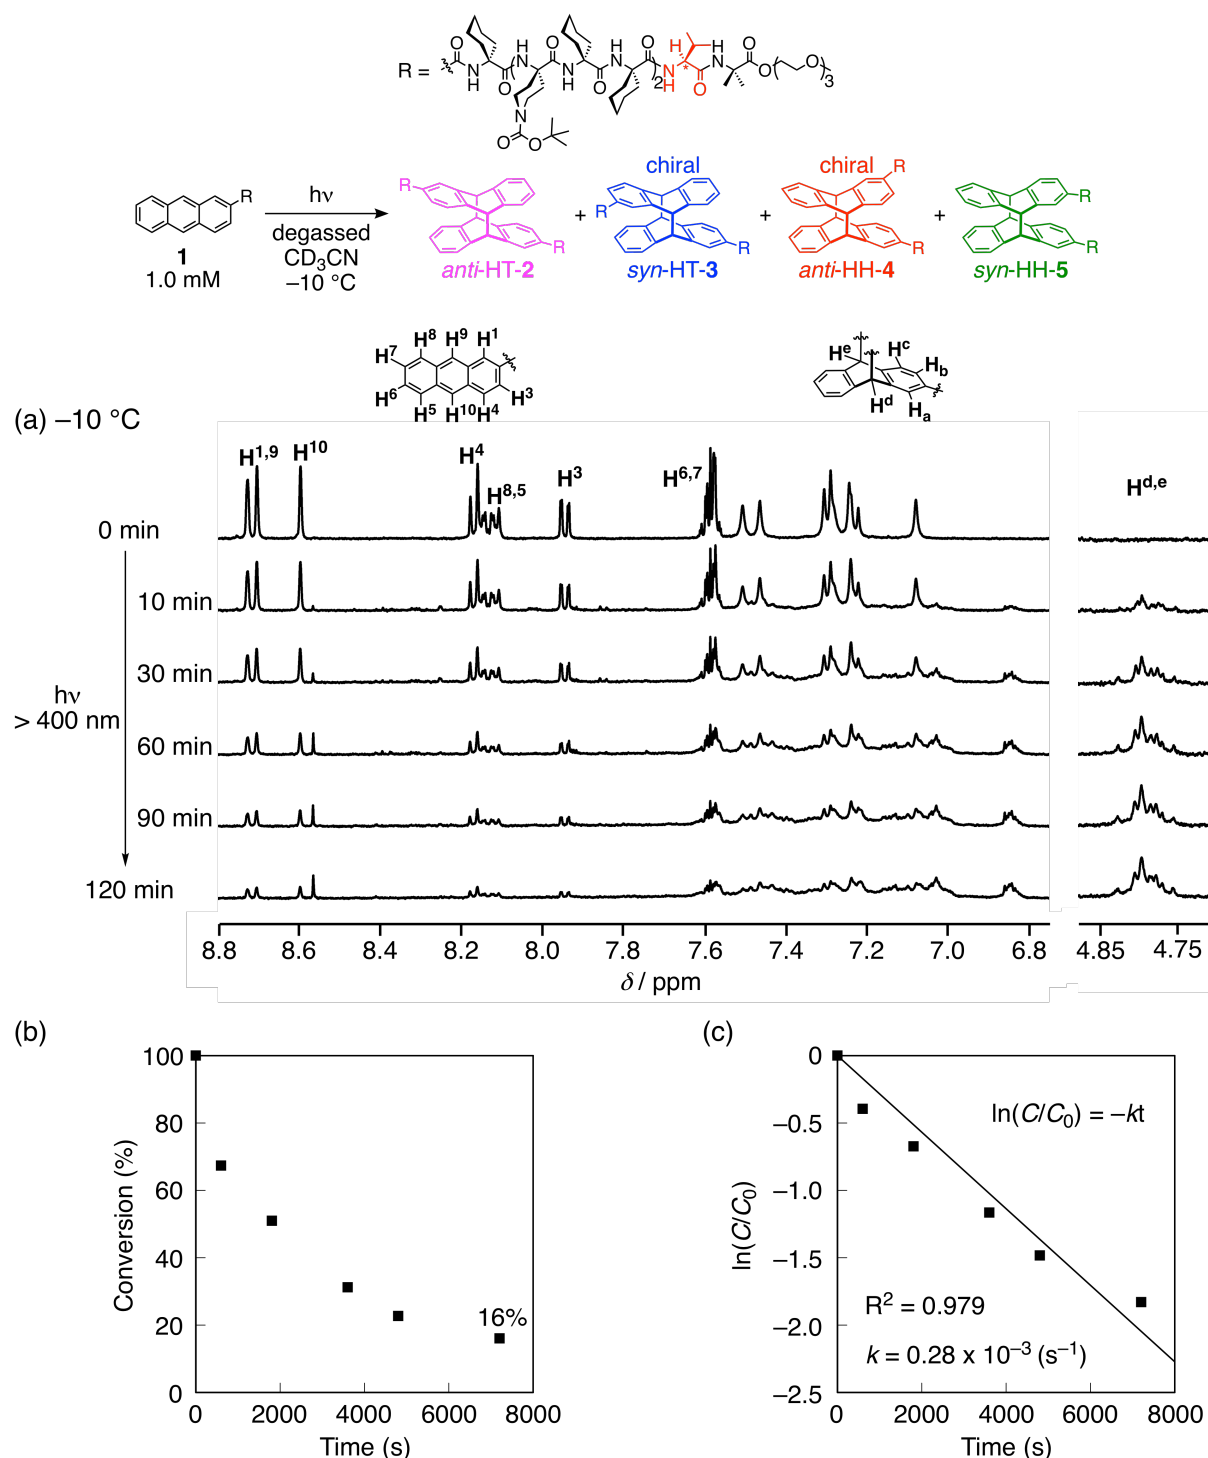

**Fig. S8** (a) Time-dependent  $^1\text{H}$  NMR spectral changes of **1** (500 MHz, degassed  $\text{CD}_3\text{CN}$ , 1.0 mM) upon light irradiation ( $> 400\text{ nm}$ ) at  $-10^\circ\text{C}$  (run 5, Table 1) measured at  $25^\circ\text{C}$ . The peak assignments of the anthracene unit were done on the basis of the gCOSY and ROESY (Fig. S14) spectra measured in  $\text{CD}_3\text{CN}$ . (b,c) Time-conversion relationships (b) and kinetic plots (c) of the photodimerization of **1** (degassed  $\text{CD}_3\text{CN}$ ,  $-10^\circ\text{C}$ , 1.0 mM) estimated from the integral ratios of the peaks for  $\text{H}^{10}$  (**1**) and 1,1,2,2-tetrachloroethane used as the internal standard on the basis of the  $^1\text{H}$  NMR spectral changes shown in (a).

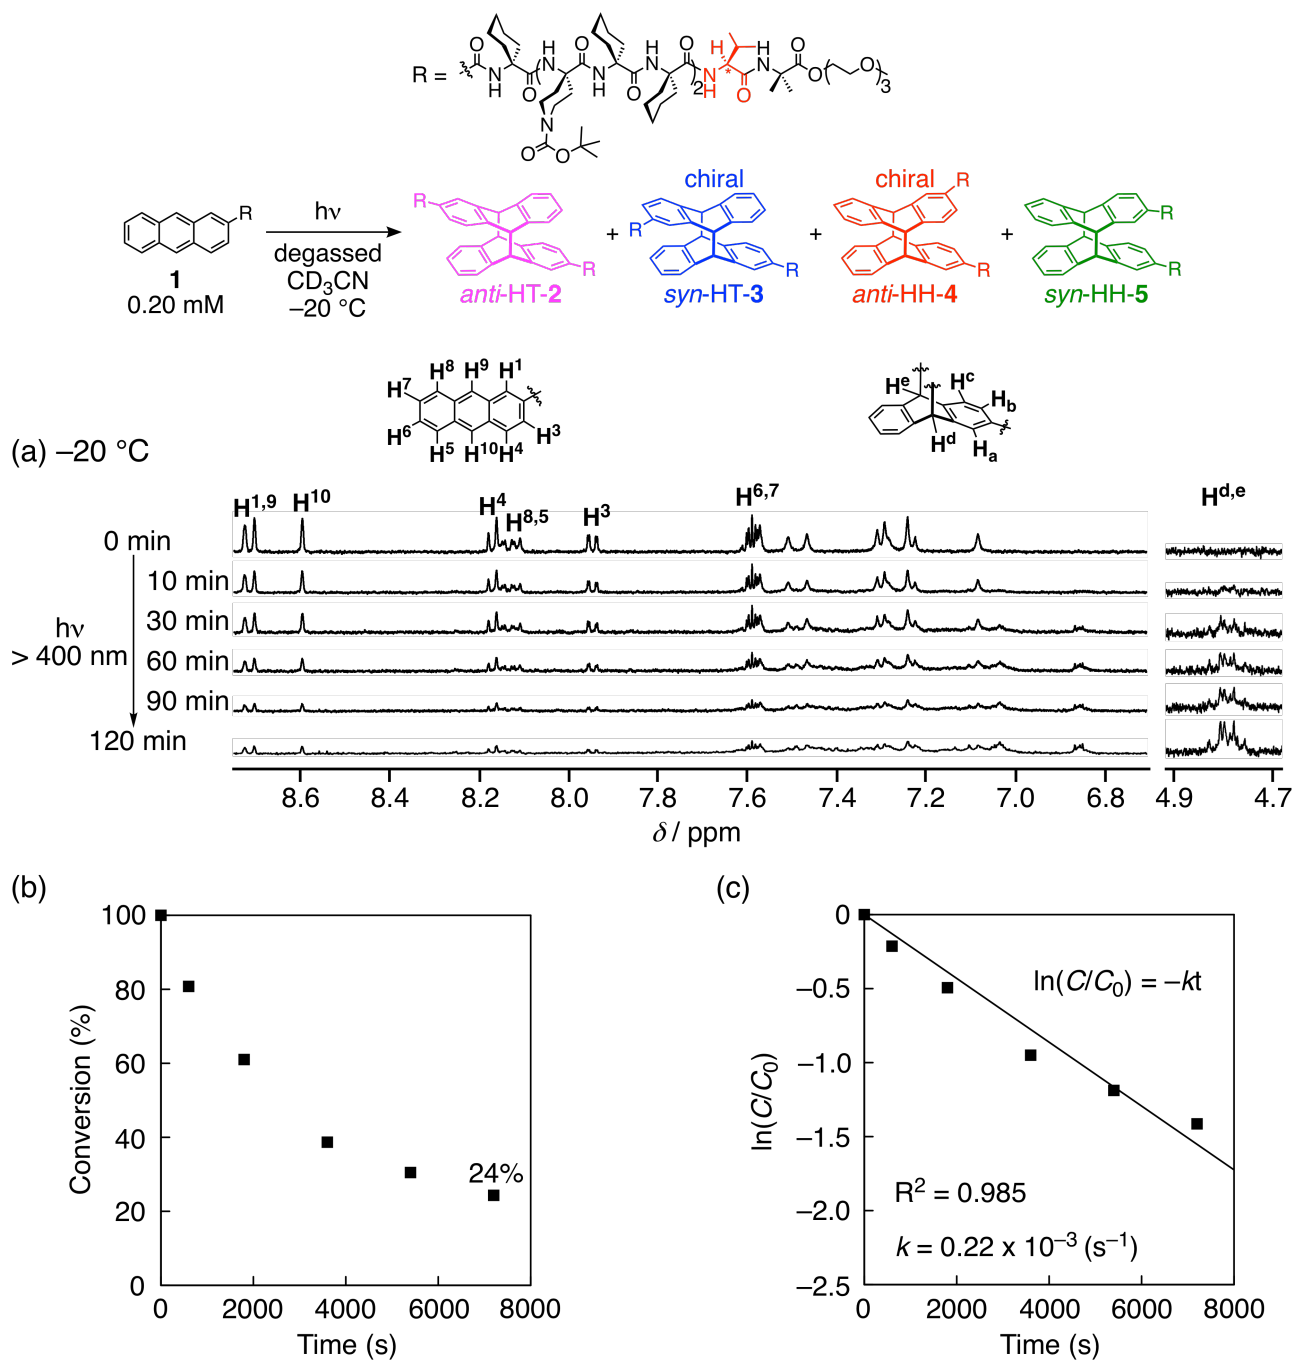

**Fig. S9** (a) Time-dependent  $^1\text{H}$  NMR spectral changes of **1** (500 MHz, degassed  $\text{CD}_3\text{CN}$ , 0.20 mM) upon light irradiation ( $> 400\text{ nm}$ ) at  $-20^\circ\text{C}$  (run 6, Table 1) measured at  $25^\circ\text{C}$ . The peak assignments of the anthracene unit were done on the basis of the gCOSY and ROESY (Fig. S14) spectra measured in  $\text{CD}_3\text{CN}$ . (b,c) Time-conversion relationships (b) and kinetic plots (c) of the photodimerization of **1** (degassed  $\text{CD}_3\text{CN}$ ,  $-20^\circ\text{C}$ , 0.20 mM) estimated from the integral ratios of the peaks for  $\text{H}^{10}$  (**1**) and 1,1,2,2-tetrachloroethane used as the internal standard on the basis of the  $^1\text{H}$  NMR spectral changes shown in (a).



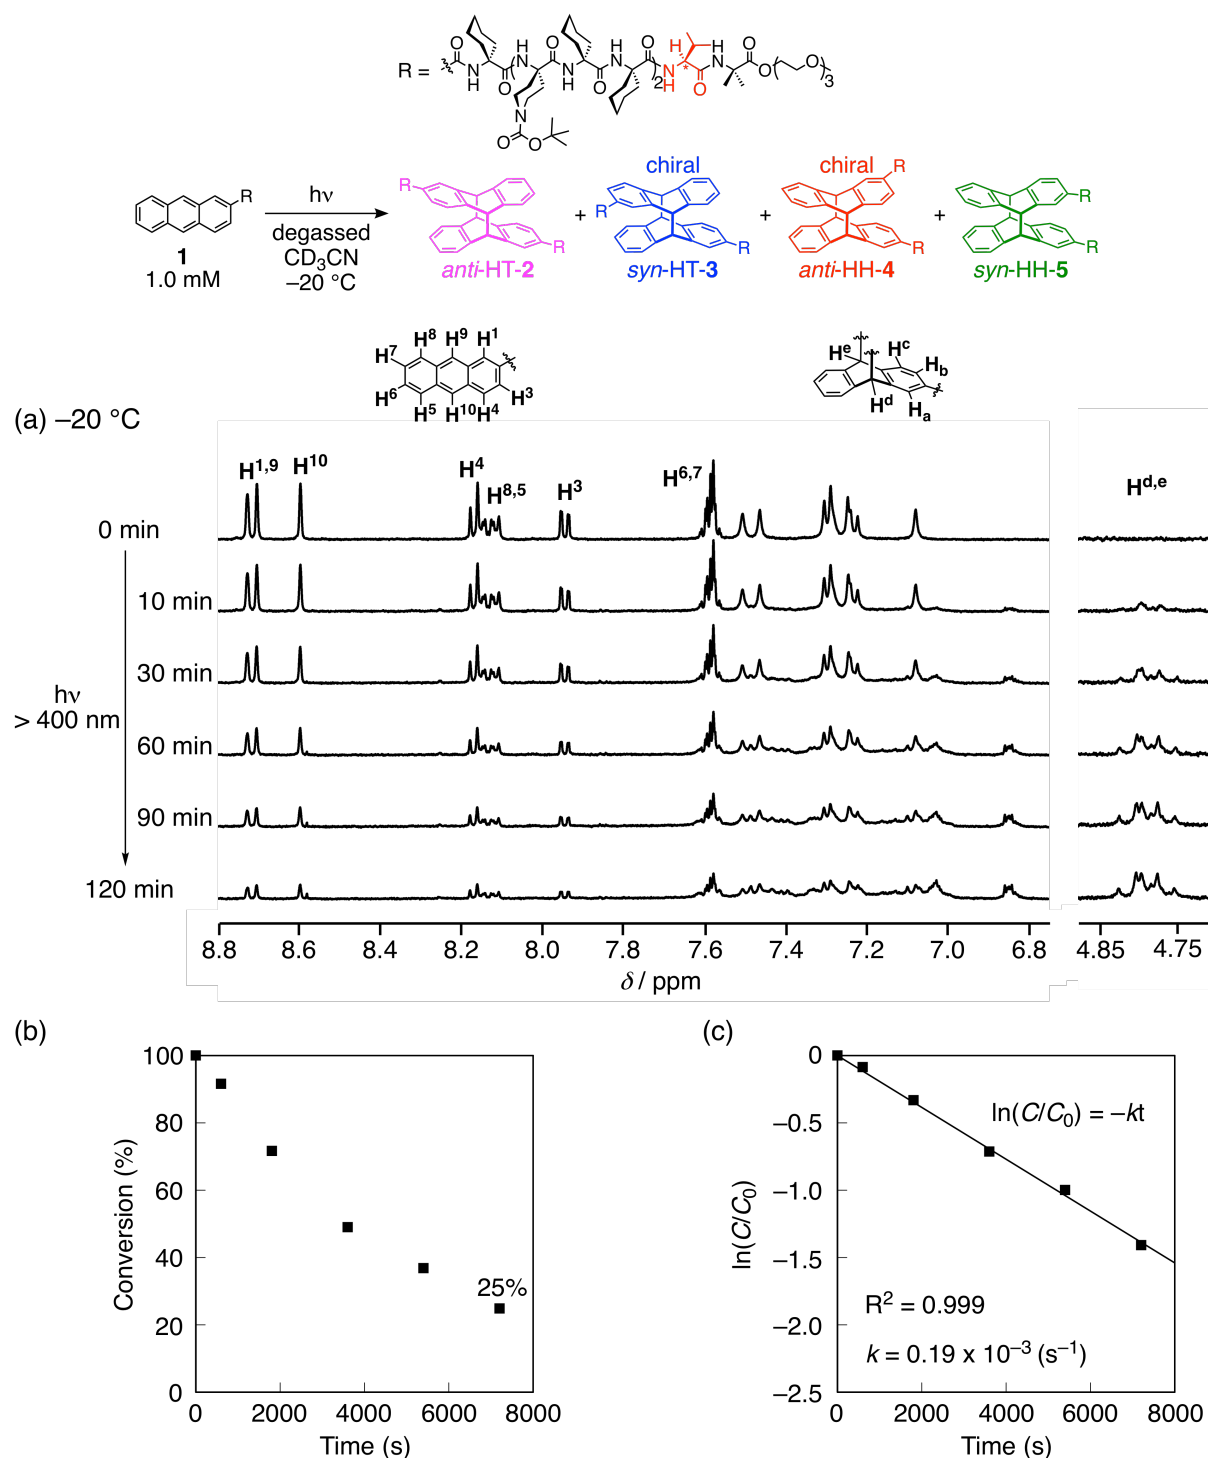

**Fig. S10** (a) Time-dependent  $^1\text{H}$  NMR spectral changes of **1** (500 MHz, degassed  $\text{CD}_3\text{CN}$ , 1.0 mM) upon light irradiation ( $> 400\text{ nm}$ ) at  $-20\text{ } ^\circ\text{C}$  (run 7, Table 1) measured at  $25\text{ } ^\circ\text{C}$ . The peak assignments of the anthracene unit were done on the basis of the gCOSY and ROESY (Fig. S14) spectra measured in  $\text{CD}_3\text{CN}$ . (b,c) Time-conversion relationships (b) and kinetic plots (c) of the photodimerization of **1** (degassed  $\text{CD}_3\text{CN}$ ,  $-20\text{ } ^\circ\text{C}$ , 1.0 mM) estimated from the integral ratios of the peaks for  $\text{H}^{10}$  (**1**) and 1,1,2,2-tetrachloroethane used as the internal standard on the basis of the  $^1\text{H}$  NMR spectral changes shown in (a).

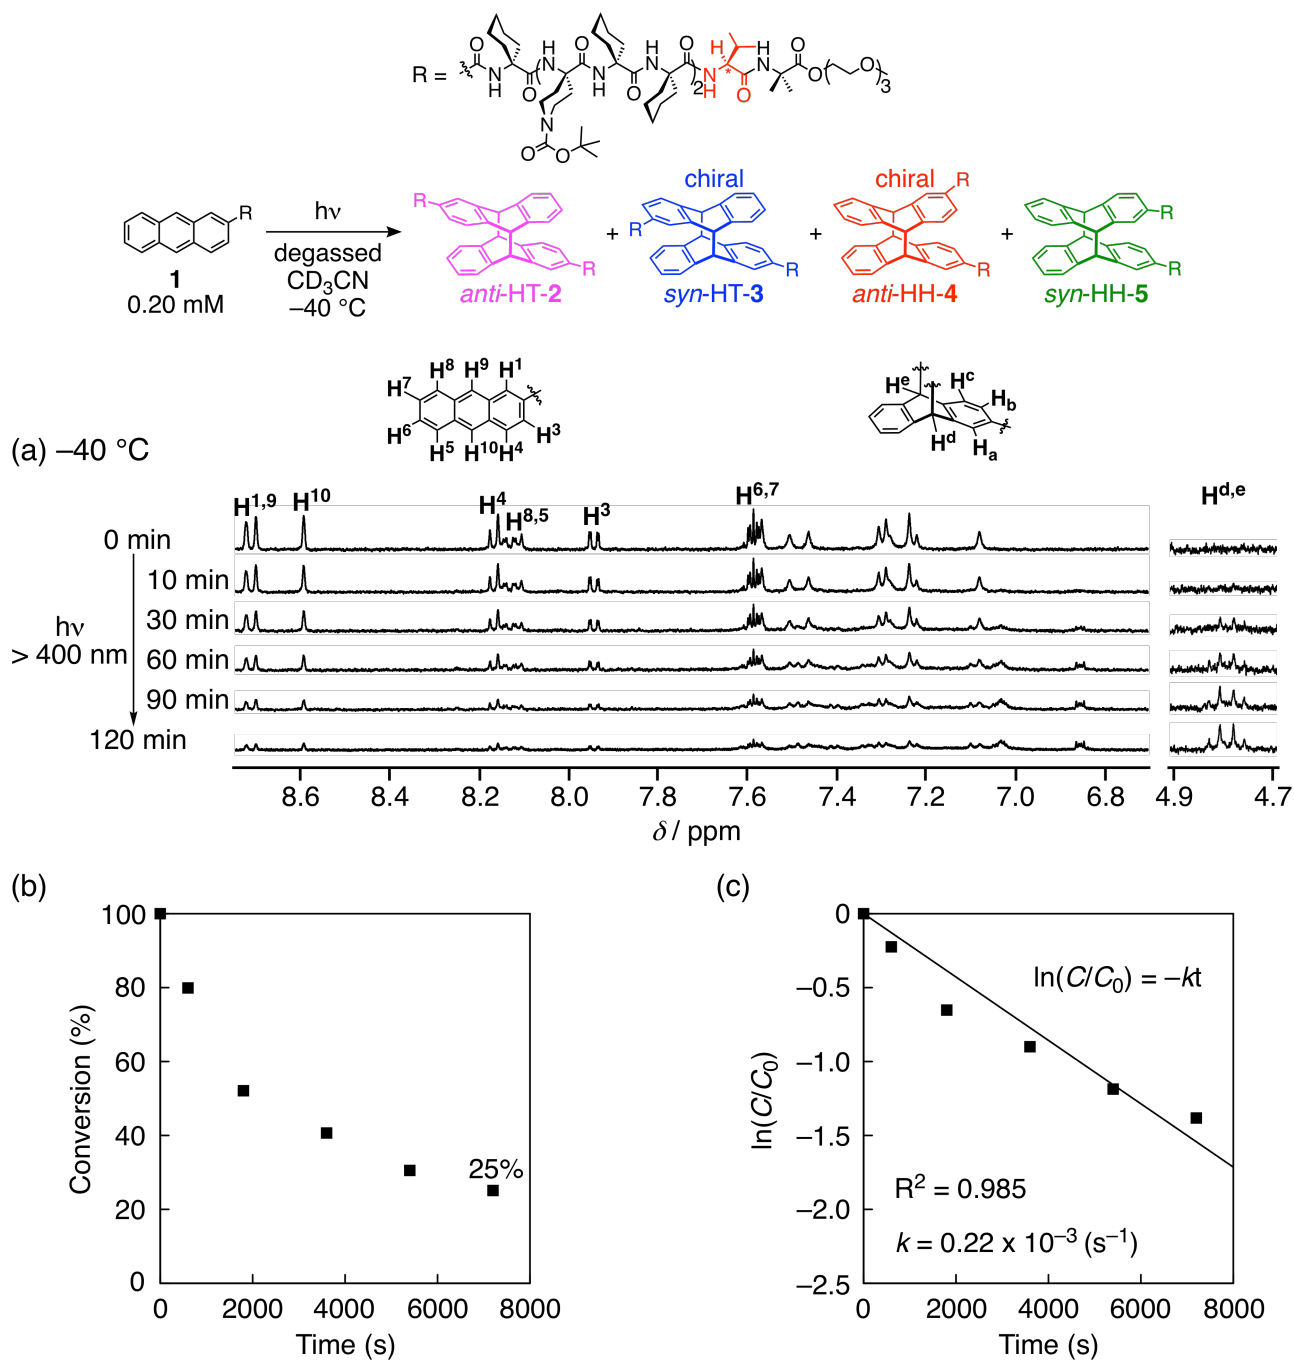

**Fig. S11** (a) Time-dependent  $^1\text{H}$  NMR spectral changes of **1** (500 MHz, degassed  $\text{CD}_3\text{CN}$ , 0.20 mM) upon light irradiation ( $> 400 \text{ nm}$ ) at  $-40^\circ\text{C}$  (run 8, Table 1) measured at  $25^\circ\text{C}$ . The peak assignments of the anthracene unit were done on the basis of the gCOSY and ROESY (Fig. S14) spectra measured in  $\text{CD}_3\text{CN}$ . (b,c) Time-conversion relationships (b) and kinetic plots (c) of the photodimerization of **1** (degassed  $\text{CD}_3\text{CN}$ ,  $-40^\circ\text{C}$ , 0.20 mM) estimated from the integral ratios of the peaks for  $\text{H}^{10}$  (**1**) and 1,1,2,2-tetrachloroethane used as the internal standard on the basis of the  $^1\text{H}$  NMR spectral changes shown in (a).

**6-2. Determination of Relative Yields of Photodimers and Diastereomeric Excesses of Chiral *syn*-Photodimers Obtained by Photodimerization of 1 under Various Conditions and Plots of the Natural Logarithms of the HT/HH and Diastereomeric Ratios against the Reciprocal Temperature.**

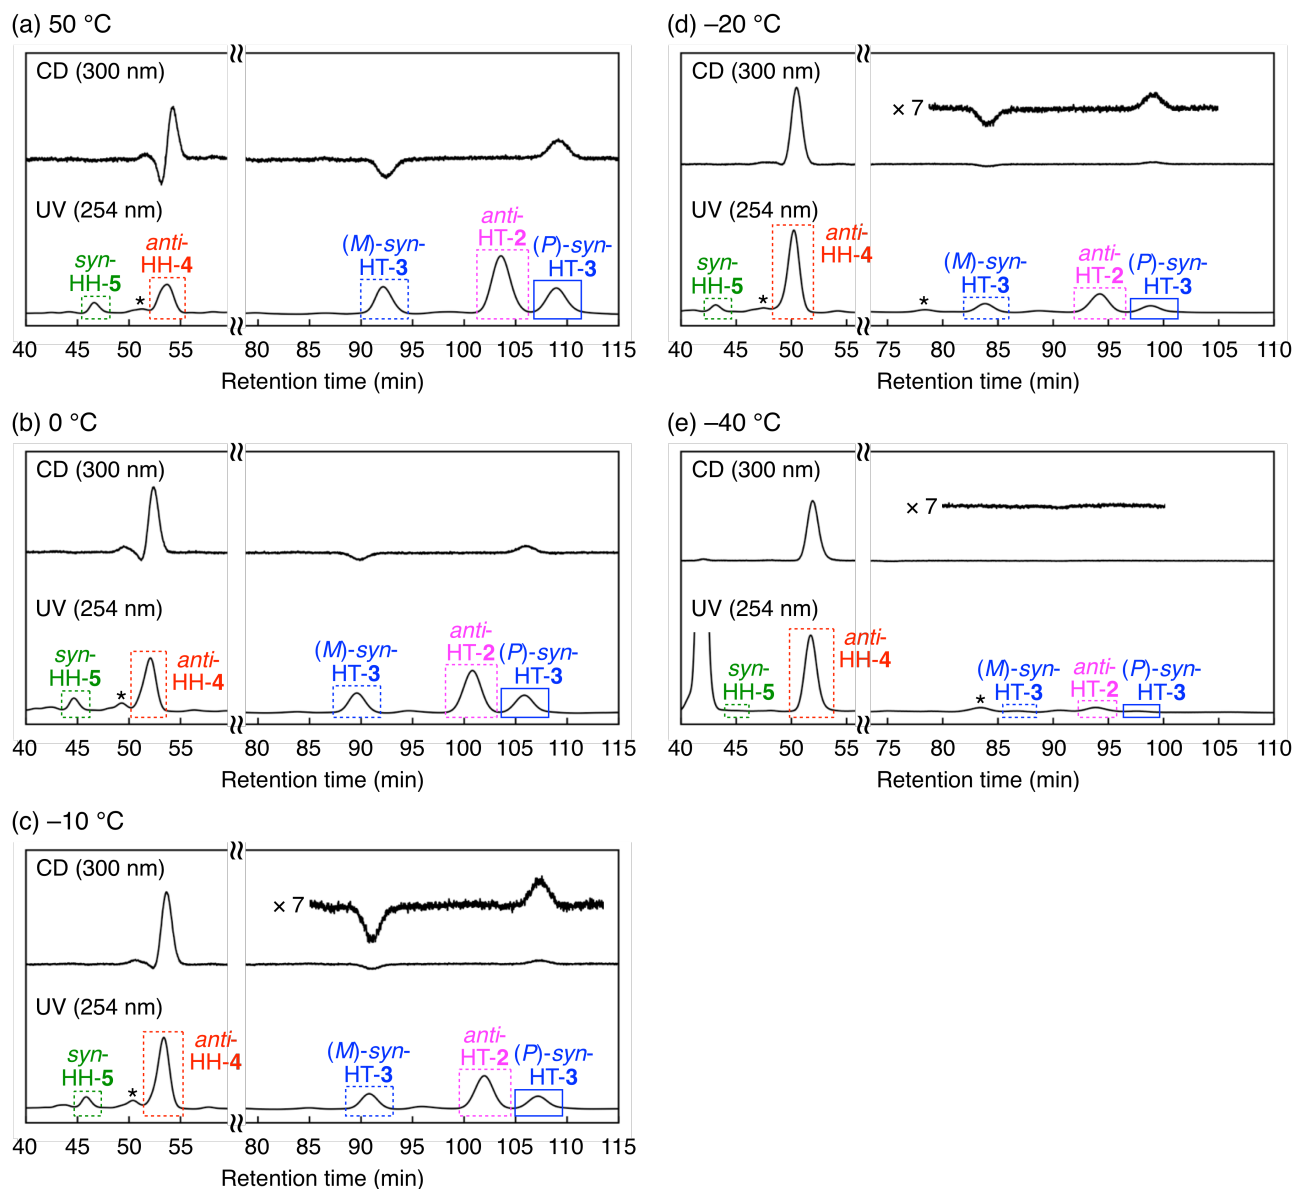

(Fig. S12 to be continued)

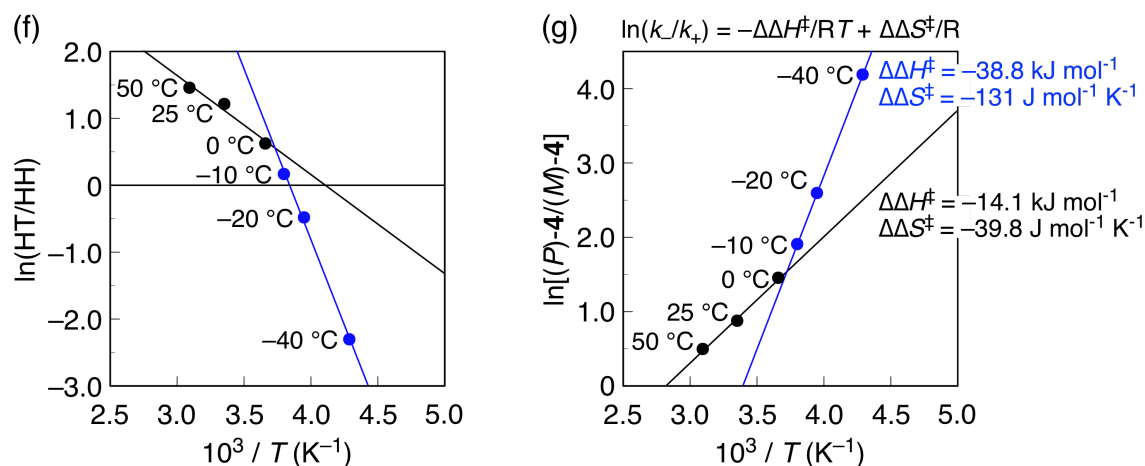

**Fig. S12** (a–e) UV and CD detected HPLC chromatograms of photodimers obtained after light irradiation ( $> 400 \text{ nm}$ ) of **1** (0.20 mM) in degassed  $\text{CD}_3\text{CN}$  at 50 (a), 0 (b),  $-10$  (c),  $-20$  (d) and  $-40$  °C (e) (runs 1, 3, 4, 6 and 8, Table 1). For the HPLC separation of the *anti*-HH-4 diastereomers, see Fig. 3b. \* denotes unknown impurities. (f,g) Plots of the natural logarithms of the HT/HH ratio of *anti*-HT-2, *syn*-HT-3, *anti*-HH-4 and *syn*-HH-5 (f) and the diastereomeric ratio of (*P*)- and (*M*)-*anti*-HH-4 ( $[(P)\text{-}4]/[(M)\text{-}4]$ ) (g) against the reciprocal temperature upon photoirradiation of **1** (data are taken from runs 1–4, 6 and 8, Table 1).

The thermodynamic parameters ( $\Delta\Delta H^\ddagger$  and  $\Delta\Delta S^\ddagger$ ) for the temperature-dependent diastereoselective photodimerization of **1** (Fig. S12g) were calculated from the slope and intercept of the plots showing two straight lines (Fig. 3d) based on the differential Eyring equation to be  $-14.1 \text{ kJ mol}^{-1}$  and  $-39.8 \text{ J mol}^{-1} \text{ K}^{-1}$  for high-temperature region (50 – 0 °C) and  $-38.8 \text{ kJ mol}^{-1}$  and  $-131 \text{ J mol}^{-1} \text{ K}^{-1}$  for low-temperature region ( $-10$  –  $-40$  °C), respectively. The same negative but different  $\Delta\Delta H^\ddagger$  and  $\Delta\Delta S^\ddagger$  values indicated that the predominant formation of the (*P*)-(+)-*anti*-HH-4 diastereomer is enthalpically more favored at lower temperatures probably due to the better intermolecular hydrogen-bonding and/or hydrophobic interactions between the peptide chains and stacking interactions between the terminal anthracene linkers of **1** assisted by a chiral aggregate formation at low temperatures, which, on the other hand, causes a formation of entropically less favored supramolecular aggregates.

## 7. ROESY NMR Spectrum of 1.

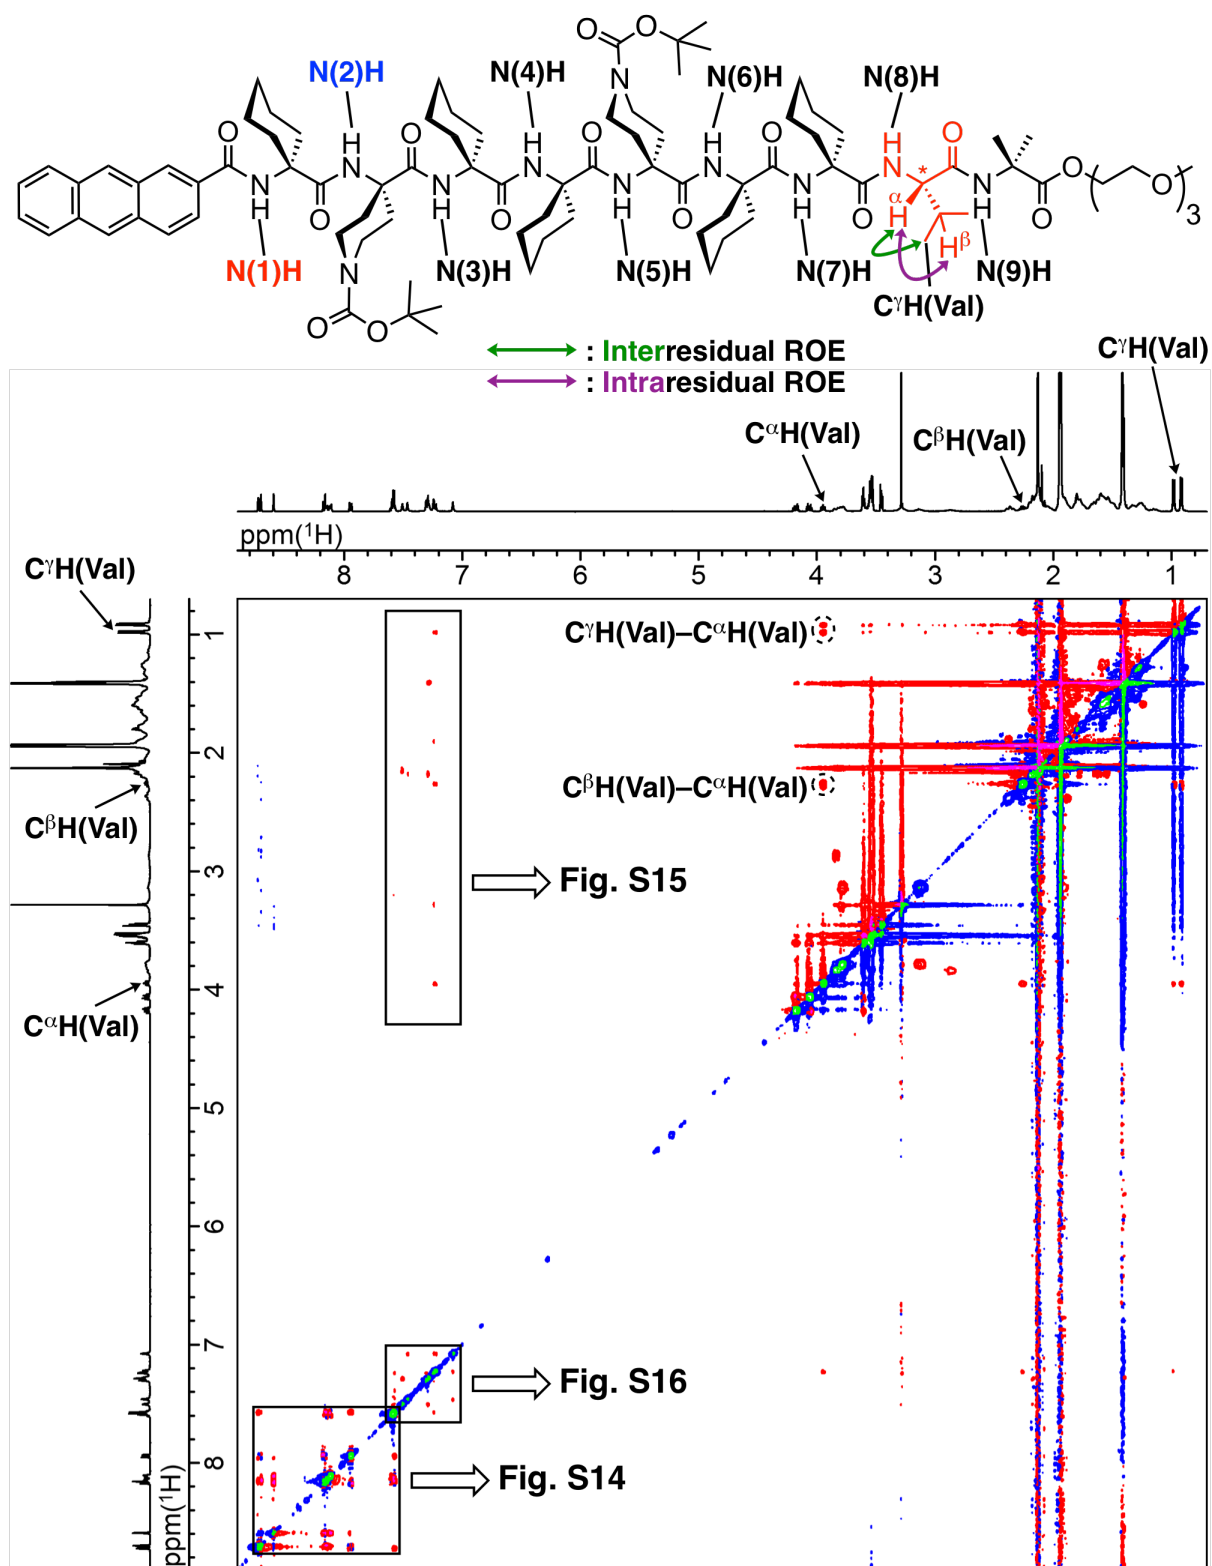

**Fig. S13** ROESY spectrum of **1** (500 MHz,  $\text{CD}_3\text{CN}$ , 25.5  $^\circ\text{C}$ , 1.0 mM, mixing time = 500 ms).

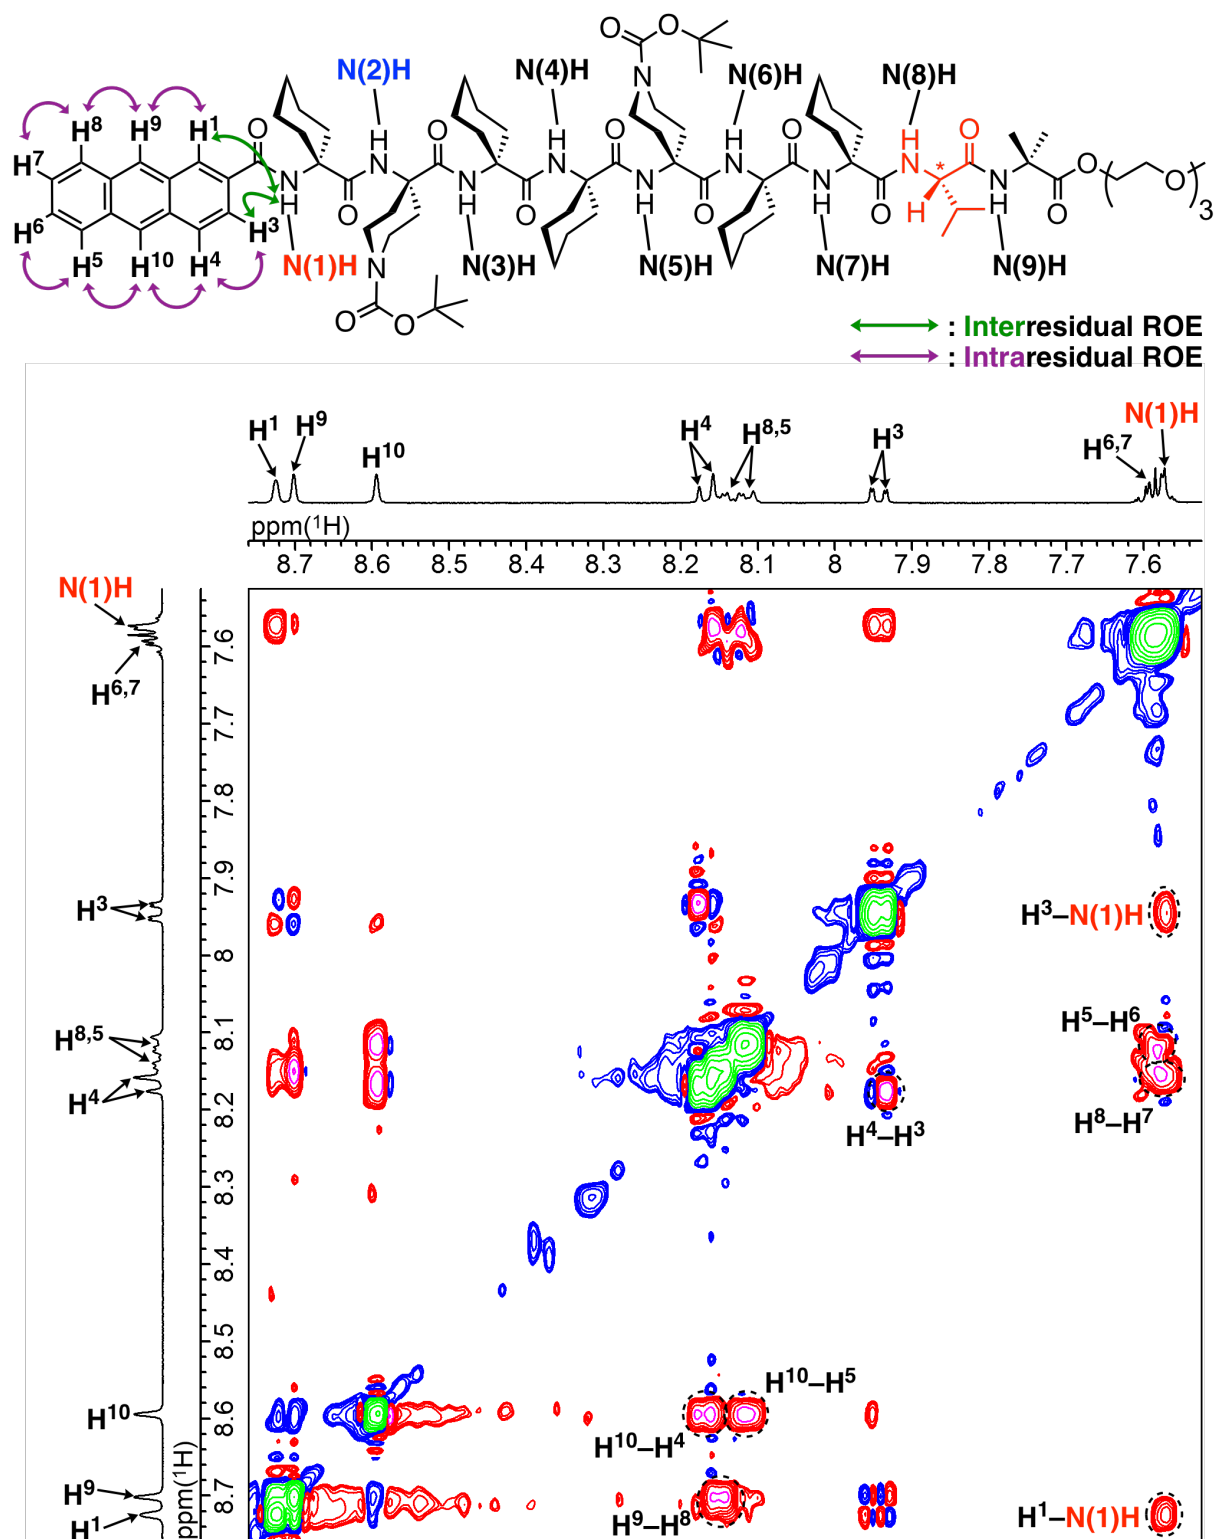

**Fig. S14** Partial ROESY spectrum of **1** (500 MHz,  $CD_3CN$ , 25.5 °C, 1.0 mM, mixing time = 500 ms).

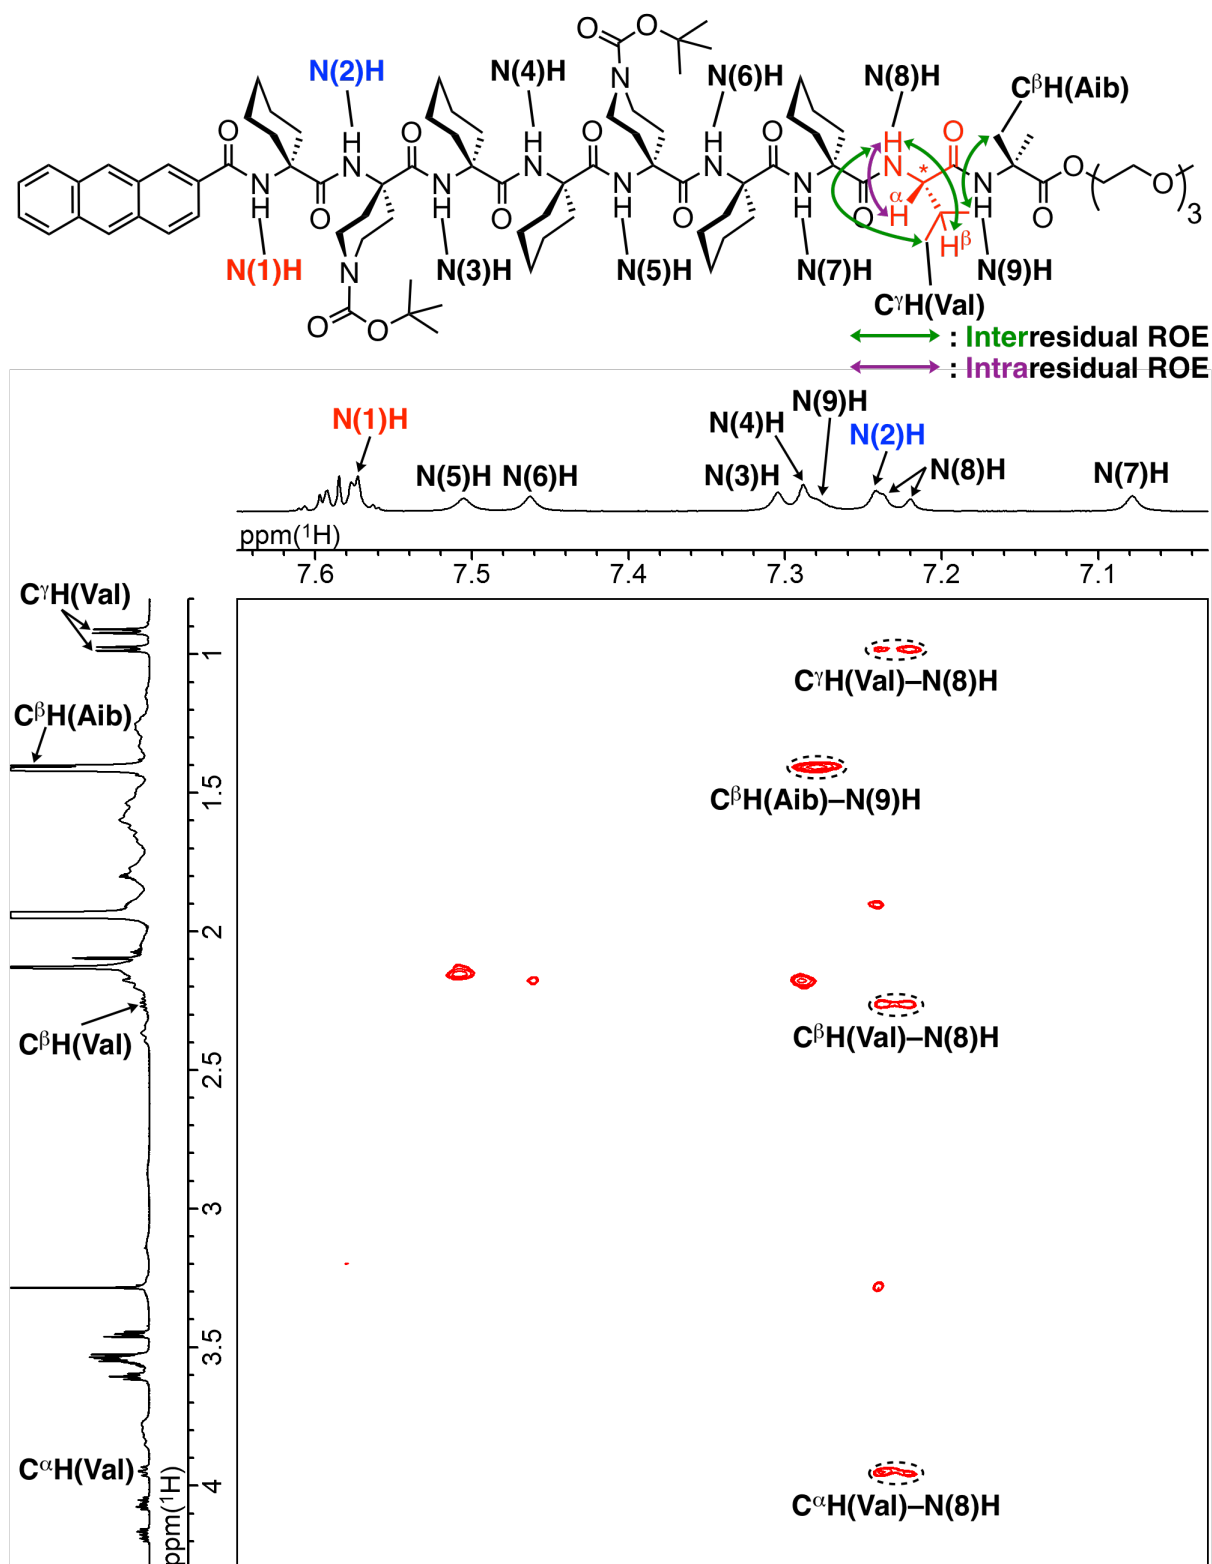

**Fig. S15** Partial ROESY spectrum of **1** (500 MHz, CD<sub>3</sub>CN, 25.5 °C, 1.0 mM, mixing time = 500 ms).

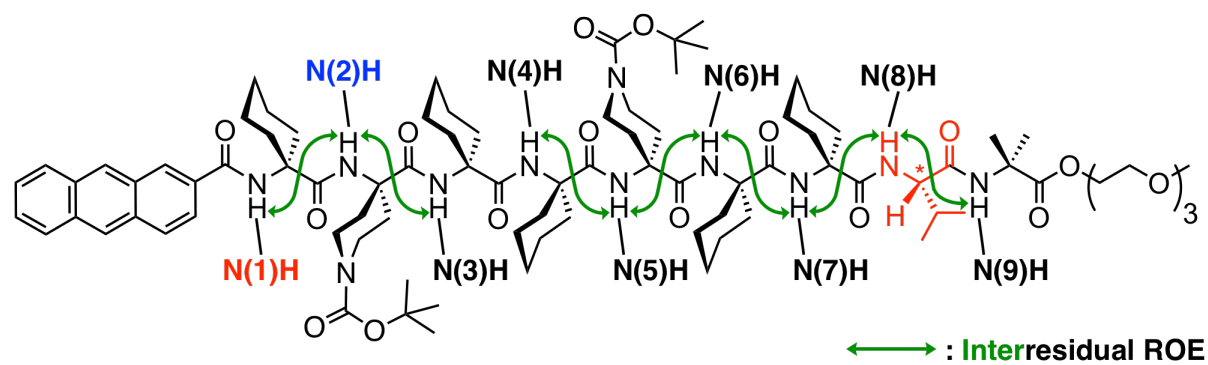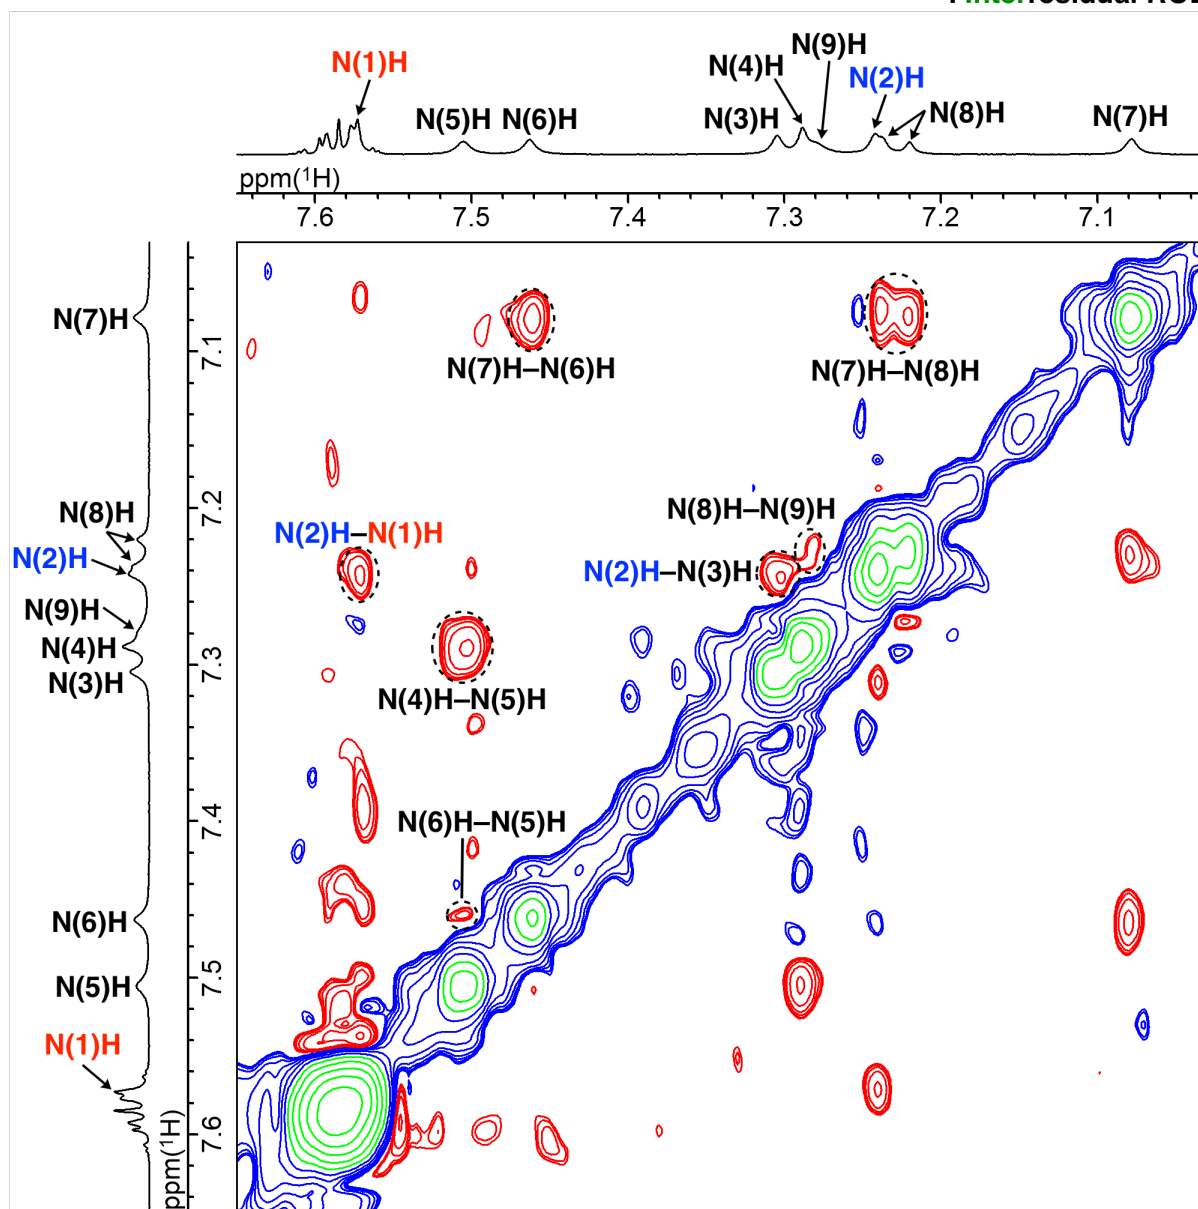

**Fig. S16** Partial ROESY spectrum of **1** (500 MHz, CD<sub>3</sub>CN, 25.5 °C, 1.0 mM, mixing time = 500 ms).



## 8. Concentration- and Temperature-Dependent $^1\text{H}$ NMR Spectral Changes.

### 8-1. Concentration-Dependent $^1\text{H}$ NMR Spectral Changes of **1** in $\text{CD}_3\text{CN}$ .

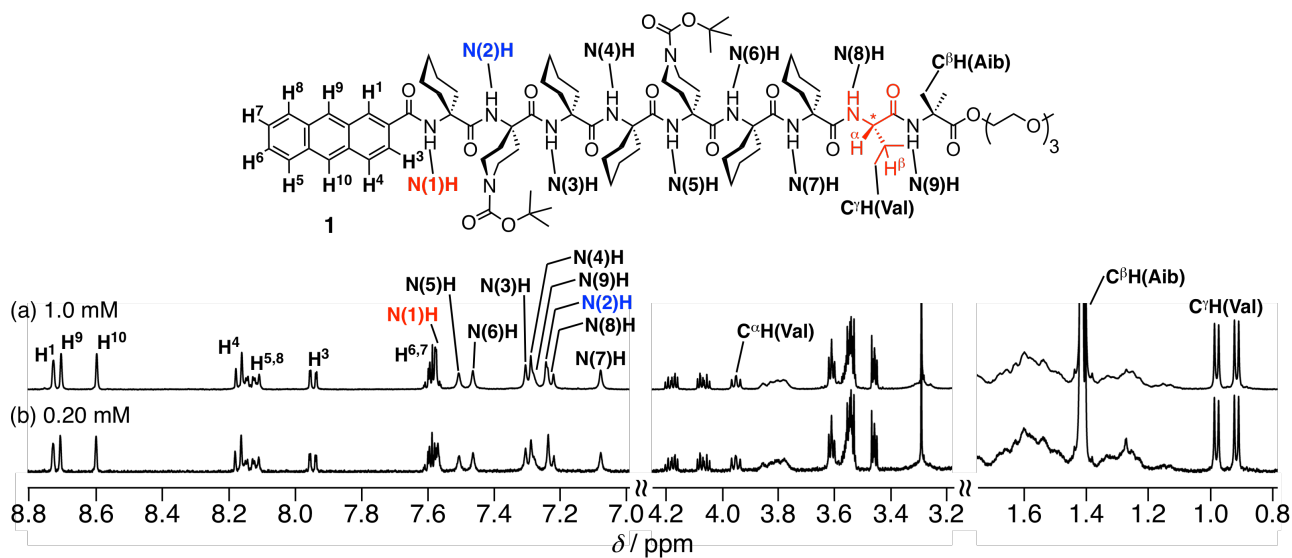

**Fig. S17**  $^1\text{H}$  NMR spectra of **1** (500 MHz,  $\text{CD}_3\text{CN}$ , 25  $^\circ\text{C}$ , 1.0 (a) and 0.20 mM (b)).

## 8-2. Temperature-Dependent $^1\text{H}$ NMR Spectral Changes of **1** and **6** in $\text{CD}_3\text{CN}$ .

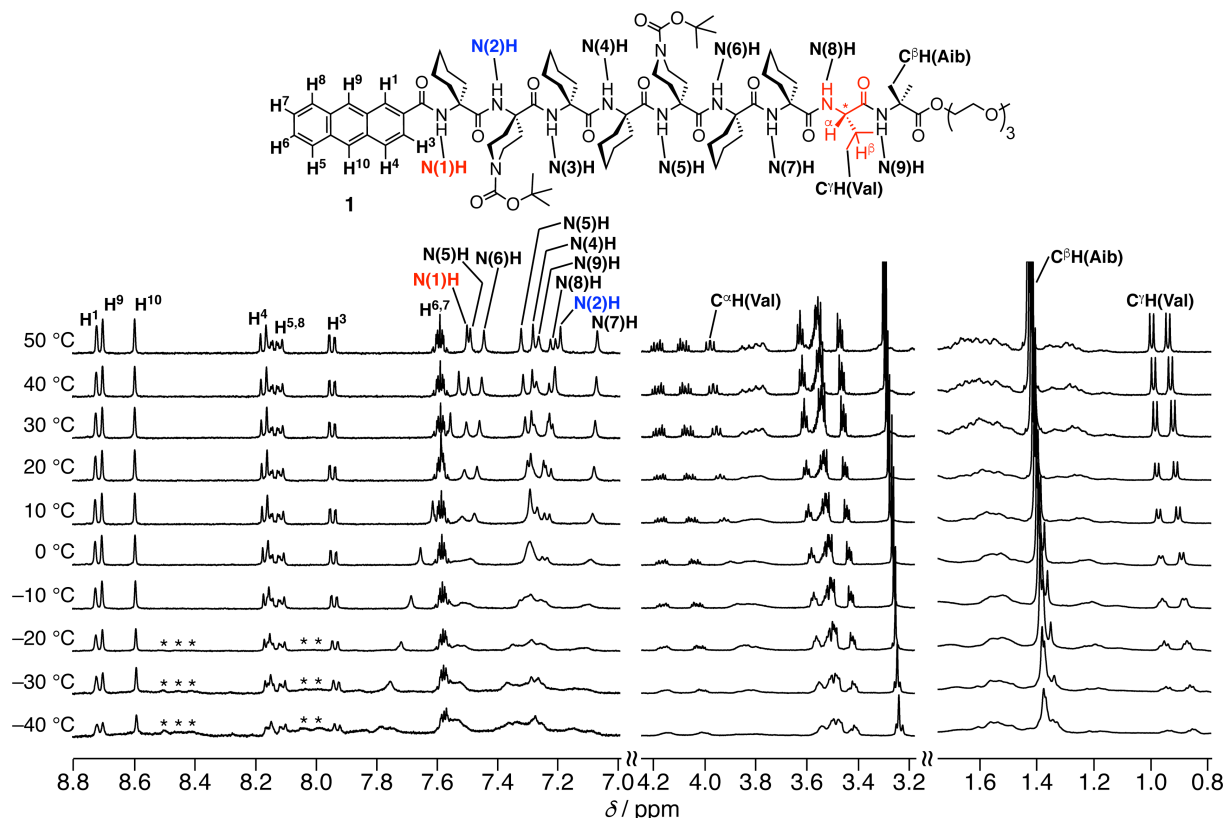

**Fig. S18** Temperature-dependent  $^1\text{H}$  NMR spectral changes of **1** (500 MHz,  $\text{CD}_3\text{CN}$ , 0.20 mM). \* denotes the peaks probably due to the aggregate formation. The anthracene protons ( $\text{H}^1\text{--}\text{H}^{10}$ ) together with the amide protons in the nonapeptide chain were assigned based on the 2D gCOSY and ROESY (Figs. S13–S16) spectra of **1** (1.0 mM) in  $\text{CD}_3\text{CN}$  at 25 °C. \* denotes the aromatic protons of the anthracene unit of **1** appeared at low temperatures.

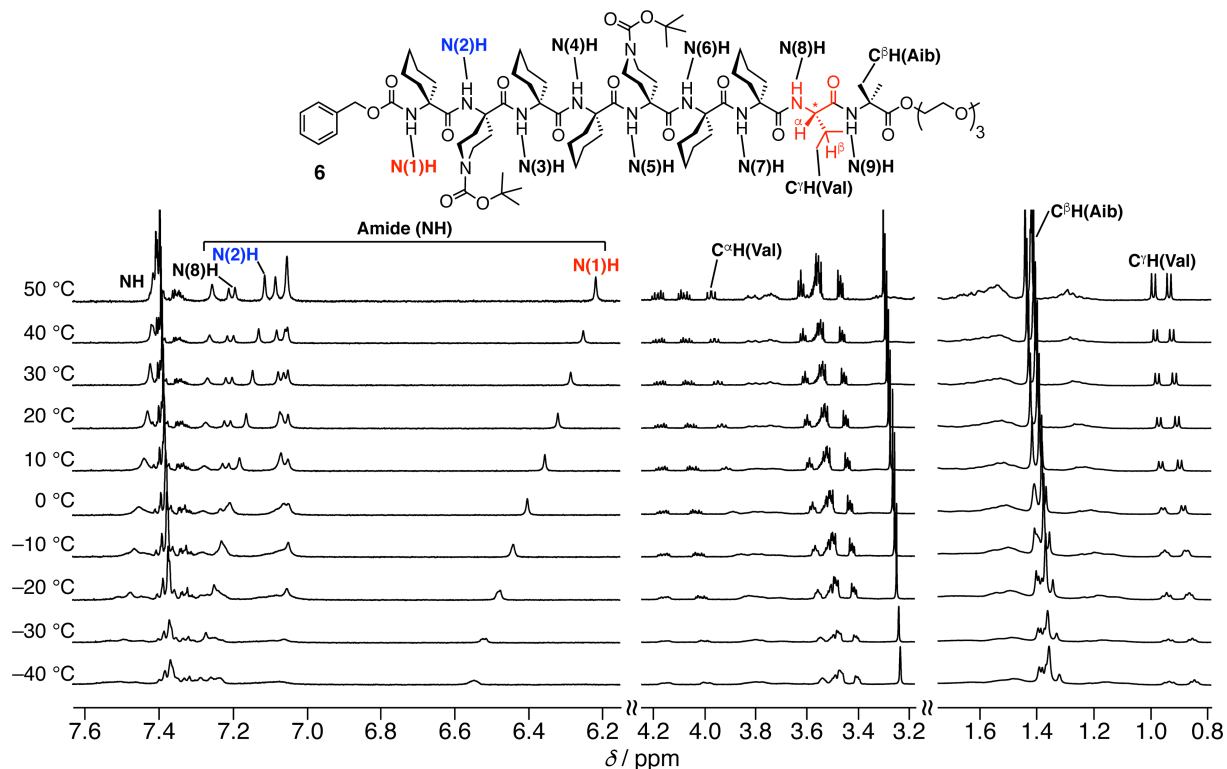

**Fig. S19** Temperature-dependent  $^1\text{H}$  NMR spectral changes of **6** (500 MHz,  $\text{CD}_3\text{CN}$ , 0.20 mM).

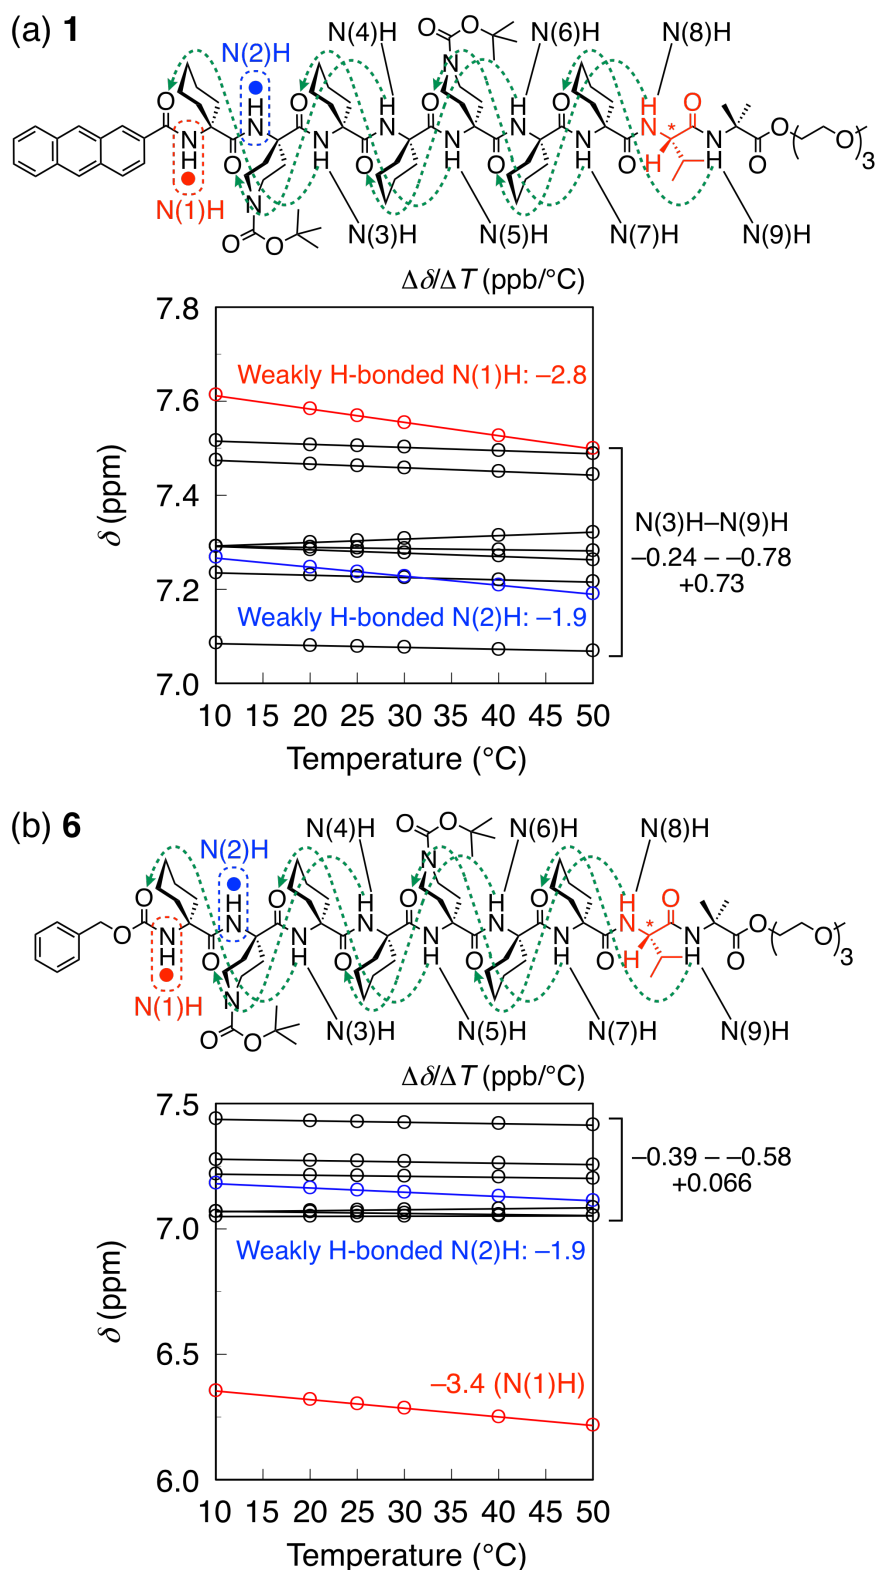

**Fig. S20** Plots of the NH chemical shifts in the  $^1\text{H}$  NMR spectra (Figs. S18 and S19) as a function of temperature in  $\text{CD}_3\text{CN}$  for **1** (0.20 mM) (a) and **6** (0.20 mM) (b). The amide NH temperature coefficients ( $\Delta\delta/\Delta T$ , ppb/°C) are also shown. On the basis of the  $\Delta\delta/\Delta T$  values of **1**, the N(1)H and N(2)H protons of **1** are weakly solvated with  $\text{CD}_3\text{CN}$  and the other amide protons are involved in the hydrogen-bonded network to form the  $3_{10}$ -helix, as supported by its ROESY spectrum (Figs. S15 and S16).<sup>S5</sup>

## 9. Comparison of the Cotton Effect Signs of Chiral *anti*- and *syn*-Photodimers with that of **1**.

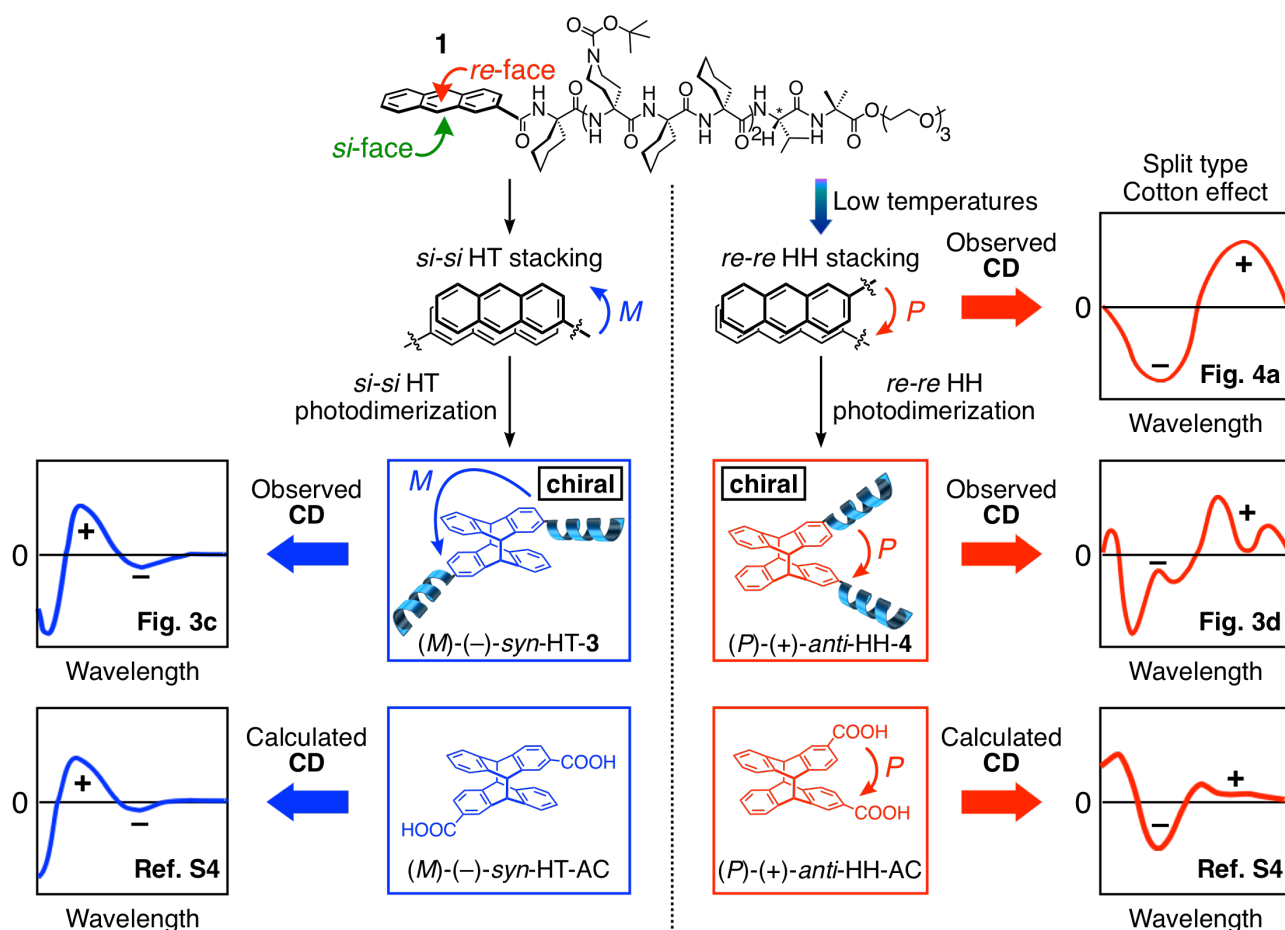

**Fig. S21** Comparison of the Cotton effect signs of chiral *anti*- and *syn*-photodimers ((*P*)-*anti*-HH-4 (right) and (*M*)-*syn*-HT-3 (left)) with that of **1**. The positive-negative exciton-coupled Cotton effect of **1** at low temperatures suggests that the two anthracene units of **1** are arranged in a (*P*) *re-re*-stacked orientation (right, top). The (*P*)-*anti*-HH-4 and (*M*)-*syn*-HT-3 cyclophotodimers preferentially produced by photoirradiation of **1** at low temperatures also show positive-negative (right, middle) and negative-positive (left, middle) exciton-coupled Cotton effects, respectively, which are in good agreement with the calculated Cotton effects of the chiral *anti*- and *syn*-photodimers ((*P*)-*anti*-HH-AC (right, bottom) and (*M*)-*syn*-HT-AC (left, bottom)) of 2-anthracenecarboxylic acid (AC) reported by Inoue and co-workers.<sup>S4</sup>

## 10. Supporting References.

- S1 C. L. Wysong, T. S. Yokum, G. A. Morales, R. L. Gundry, M. L. McLaughlin and R. P. Hammer, *J. Org. Chem.*, 1996, **61**, 7650–7651.
- S2 N. Ousaka, Y. Takeyama, H. Iida and E. Yashima, *Nat. Chem.*, 2011, **3**, 856–861.
- S3 P. TAILLEUR and L. BERLINGUET, *Can. J. Chem.*, 1961, **39**, 1309–1320.
- S4 A. Wakai, H. Fukasawa, C. Yang, T. Mori and Y. Inoue, *J. Am. Chem. Soc.*, 2012, **134**, 4990–4997.
- S5 (a) G. M. Bonora, C. Mapelli, C. Toniolo, R. R. Wilkening and E. S. Stevens, *Int. J. Biol. Macromol.*, 1984, **6**, 179–188; (b) A. Polese, F. Formaggio, M. Crisma, G. Valle, C. Toniolo, G. M. Bonora, Q. B. Broxterman and J. Kamphuis, *Chem. Eur. J.*, 1996, **2**, 1104–1111.

## 11. Spectroscopic Data.

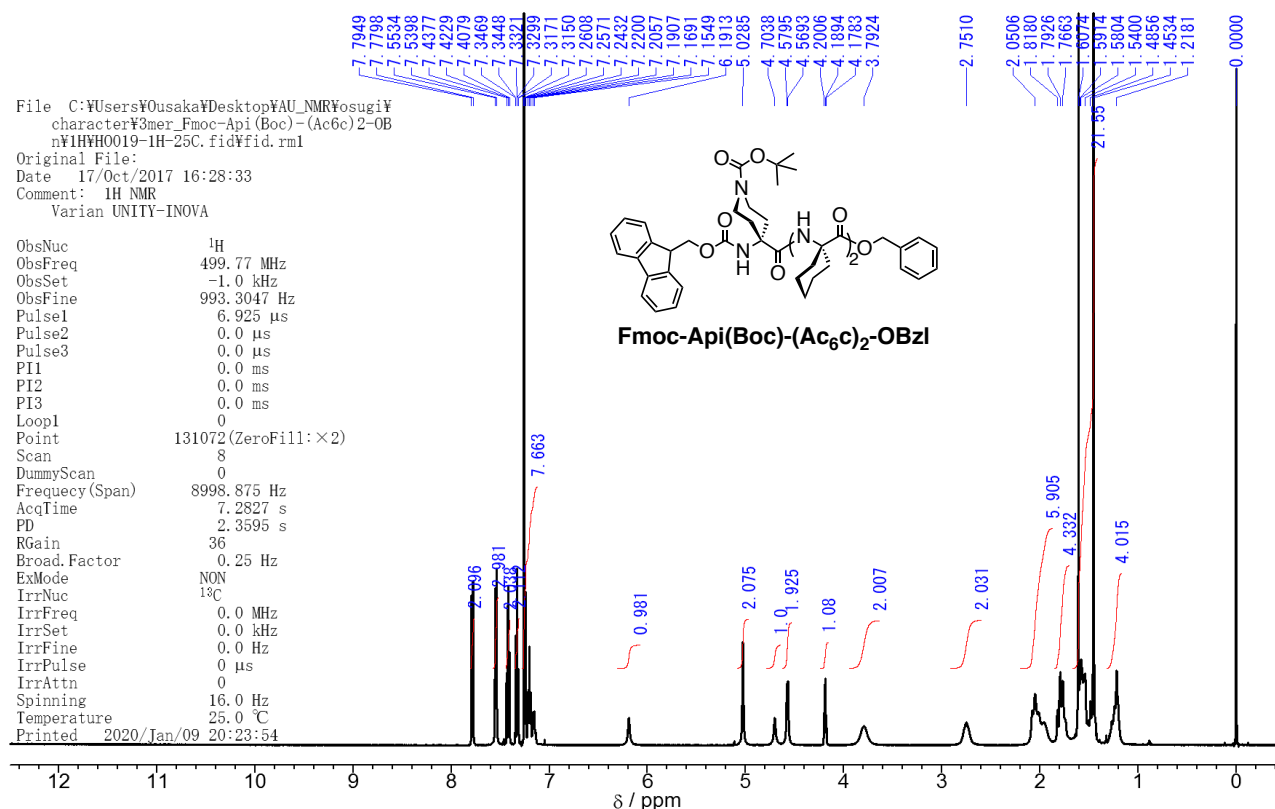

**Fig. S22**  $^1\text{H}$  NMR spectrum of Fmoc-Api(Boc)-(Ac<sub>6</sub>c)<sub>2</sub>-OBzl in CDCl<sub>3</sub> at 25  $^{\circ}\text{C}$ .

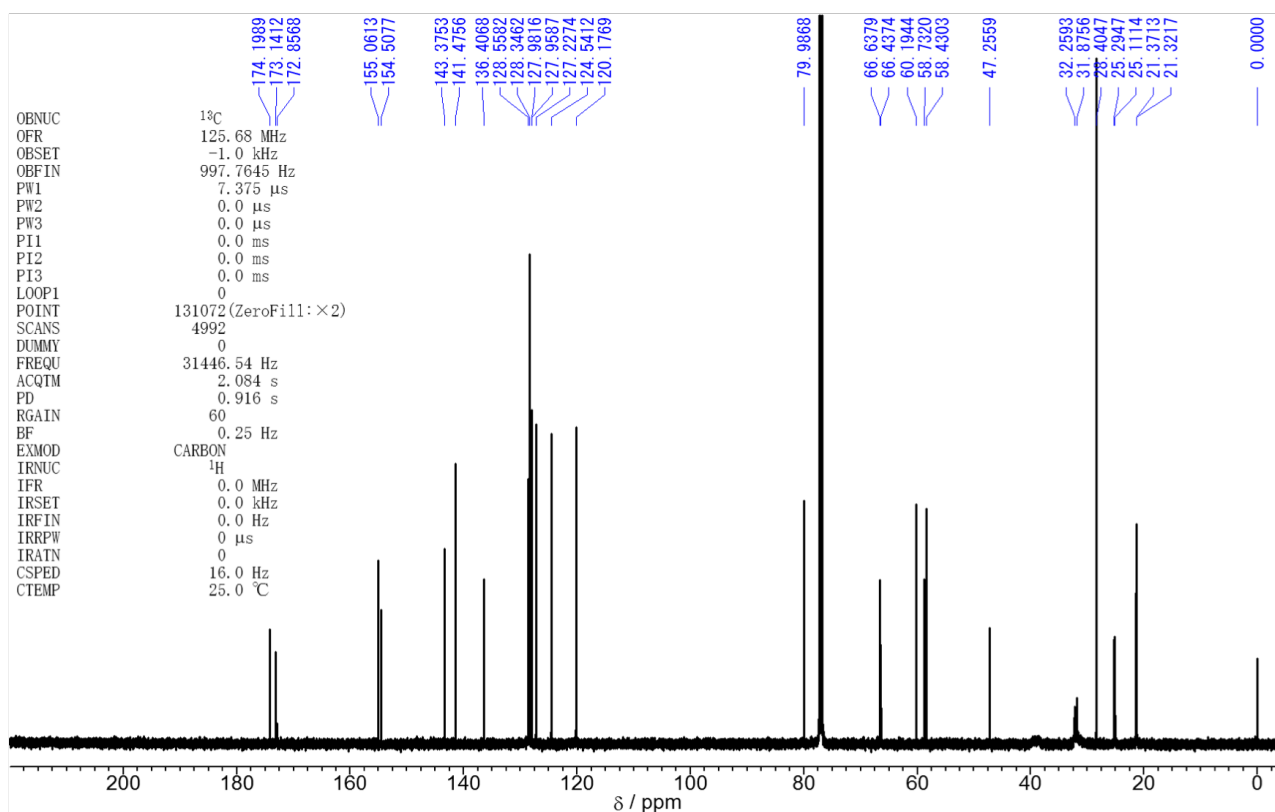

**Fig. S23**  $^{13}\text{C}$  NMR spectrum of Fmoc-Api(Boc)-(Ac<sub>6</sub>c)<sub>2</sub>-OBzl in CDCl<sub>3</sub> at 25  $^{\circ}\text{C}$ .

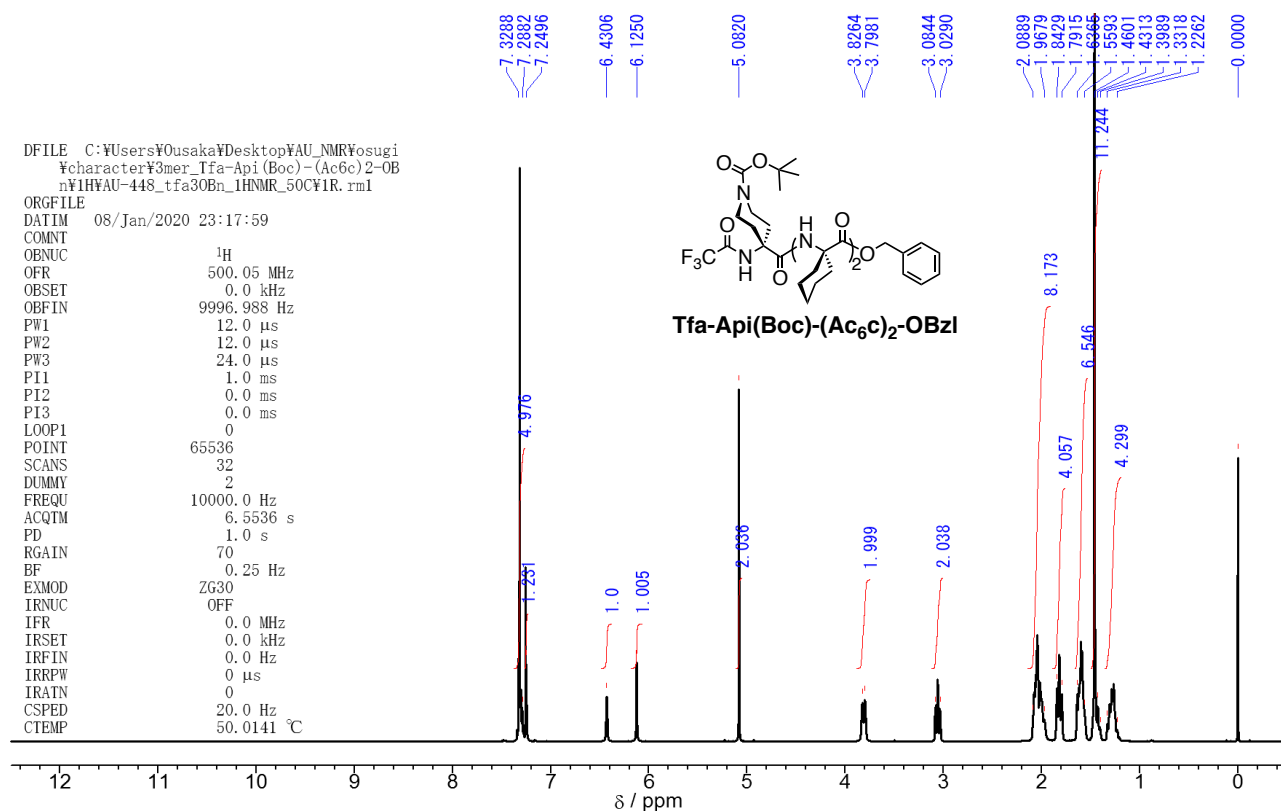

**Fig. S24** <sup>1</sup>H NMR spectrum of Tfa-Api(Boc)-(Ac<sub>6</sub>c)<sub>2</sub>-OBzl in CDCl<sub>3</sub> at 50 °C.

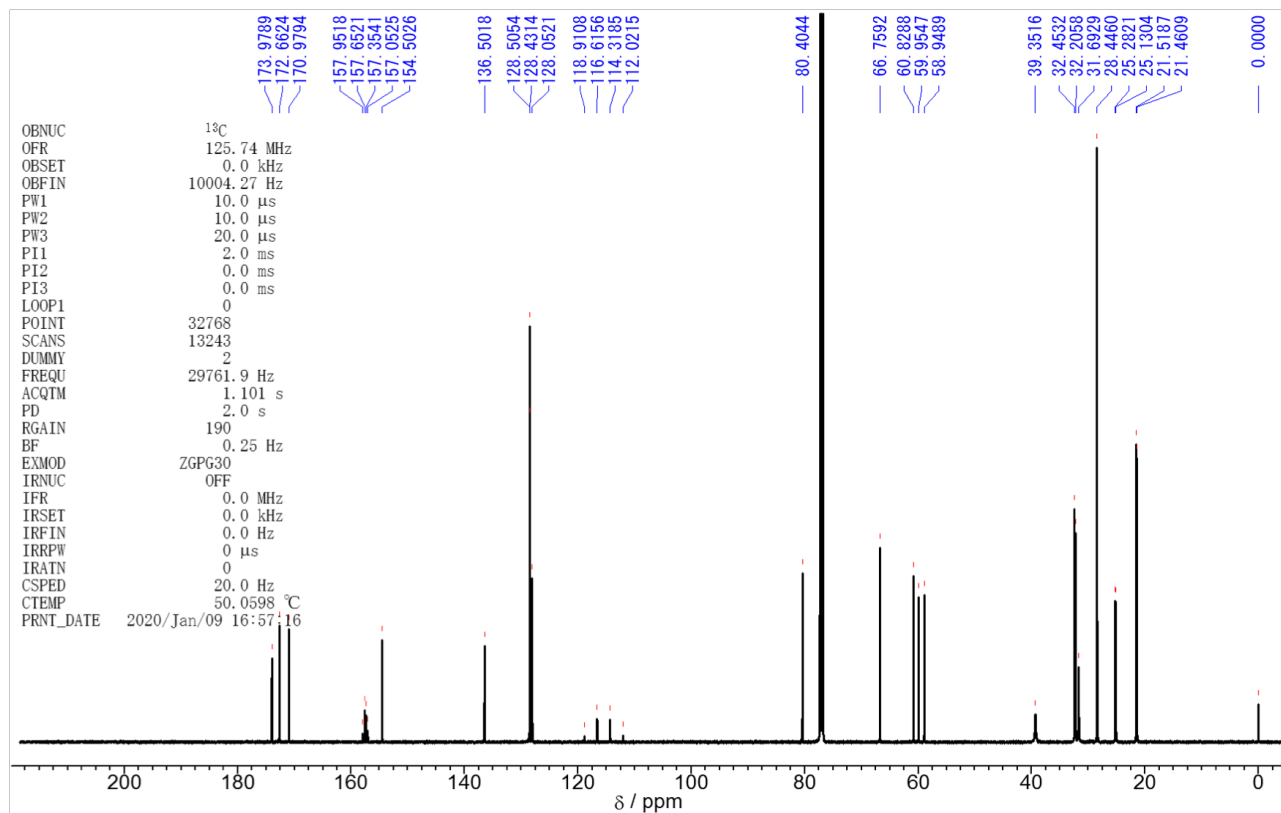

**Fig. S25** <sup>13</sup>C NMR spectrum of Tfa-Api(Boc)-(Ac<sub>6</sub>c)<sub>2</sub>-OBzl in CDCl<sub>3</sub> at 50 °C.

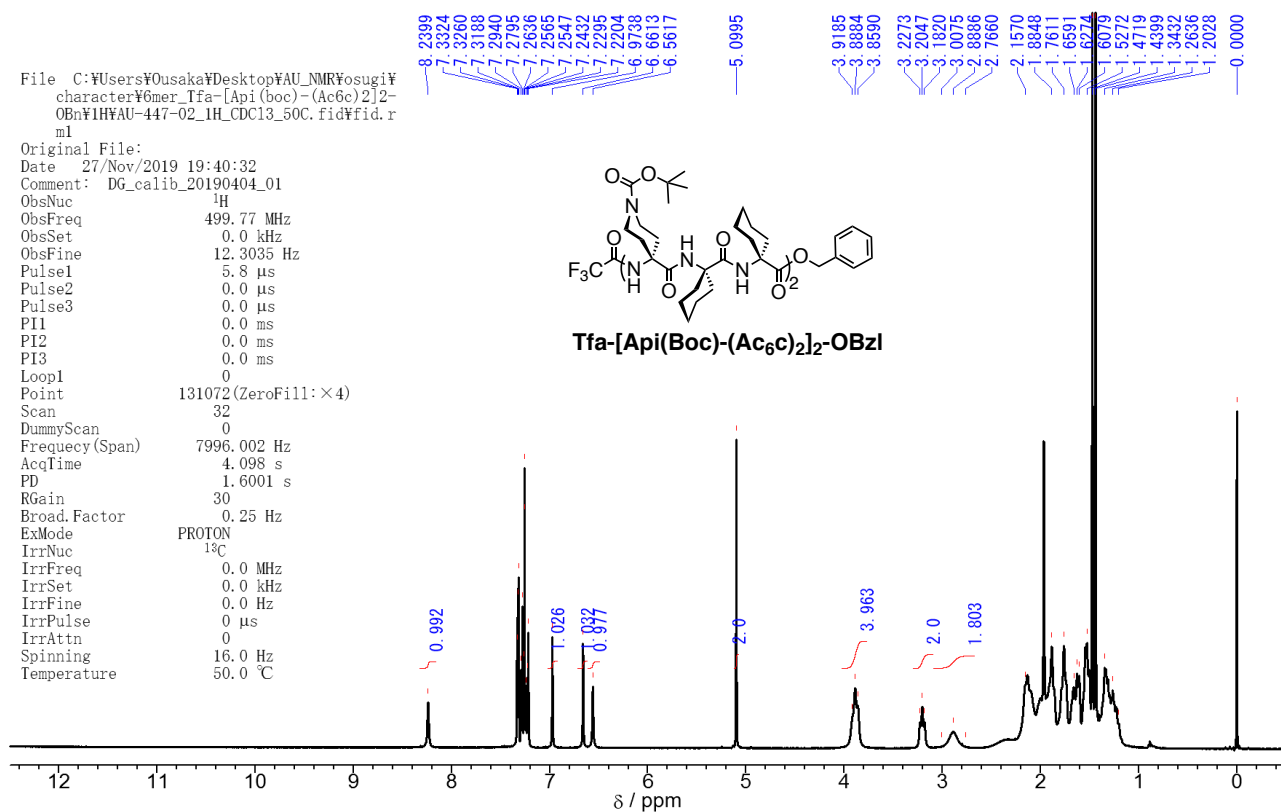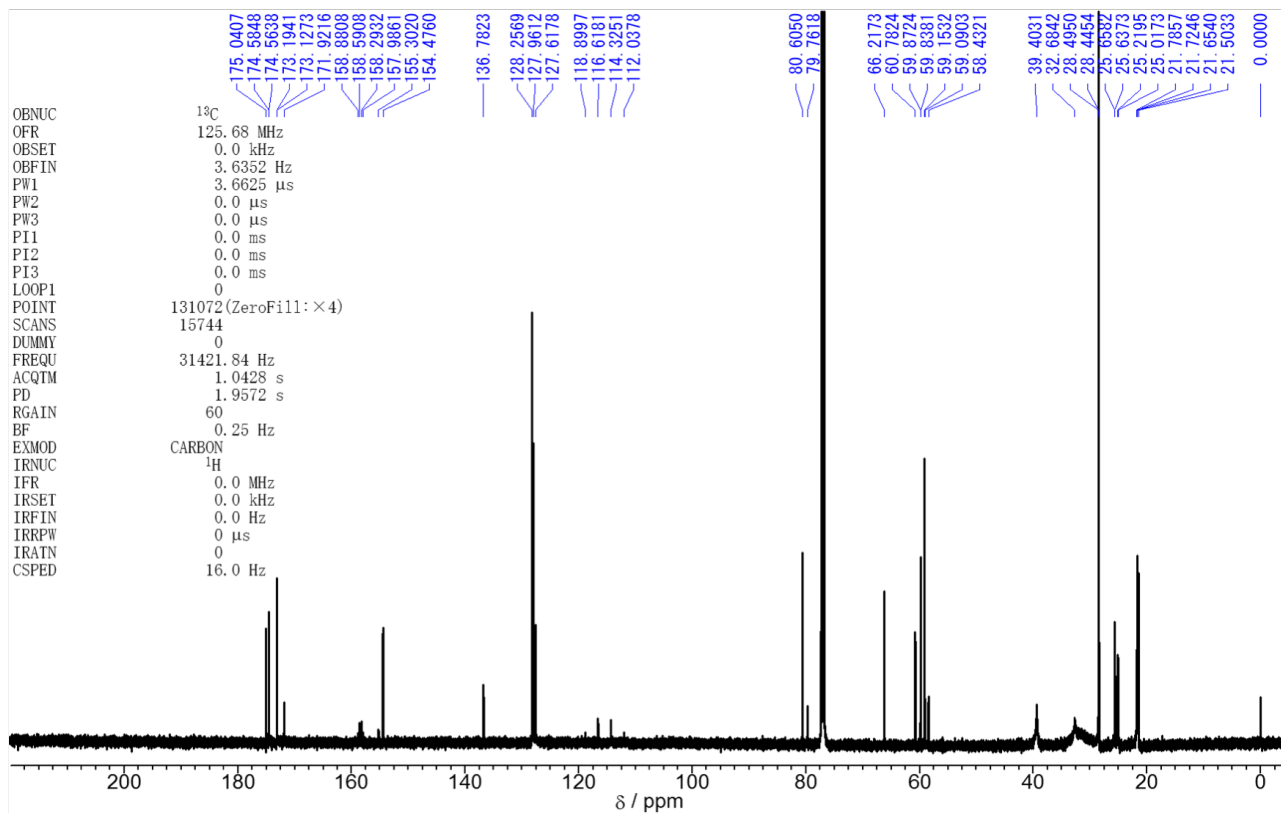



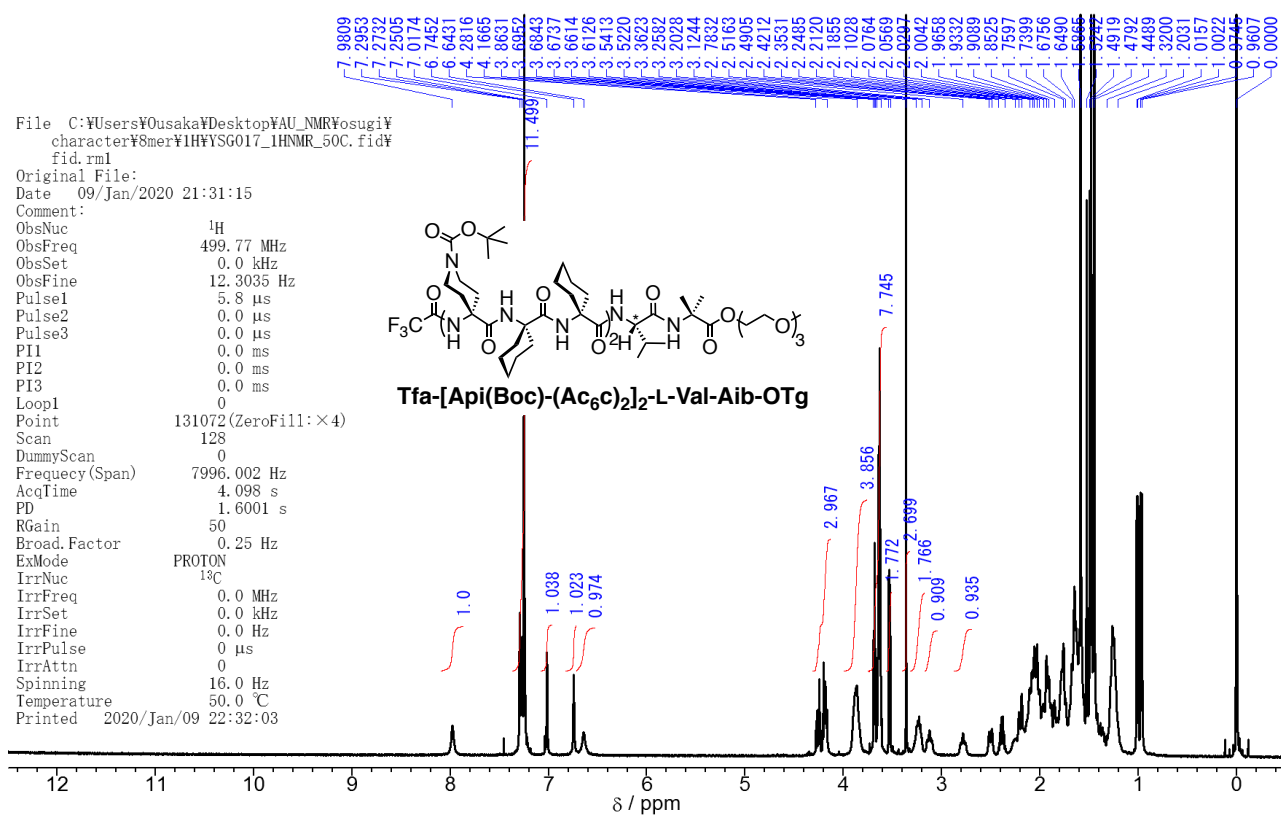

**Fig. S28**  $^1\text{H}$  NMR spectrum of Tfa-[Api(Boc)-(Ac<sub>6</sub>c)<sub>2</sub>]<sub>2</sub>-L-Val-Aib-OTg in CDCl<sub>3</sub> at 50  $^{\circ}\text{C}$ .

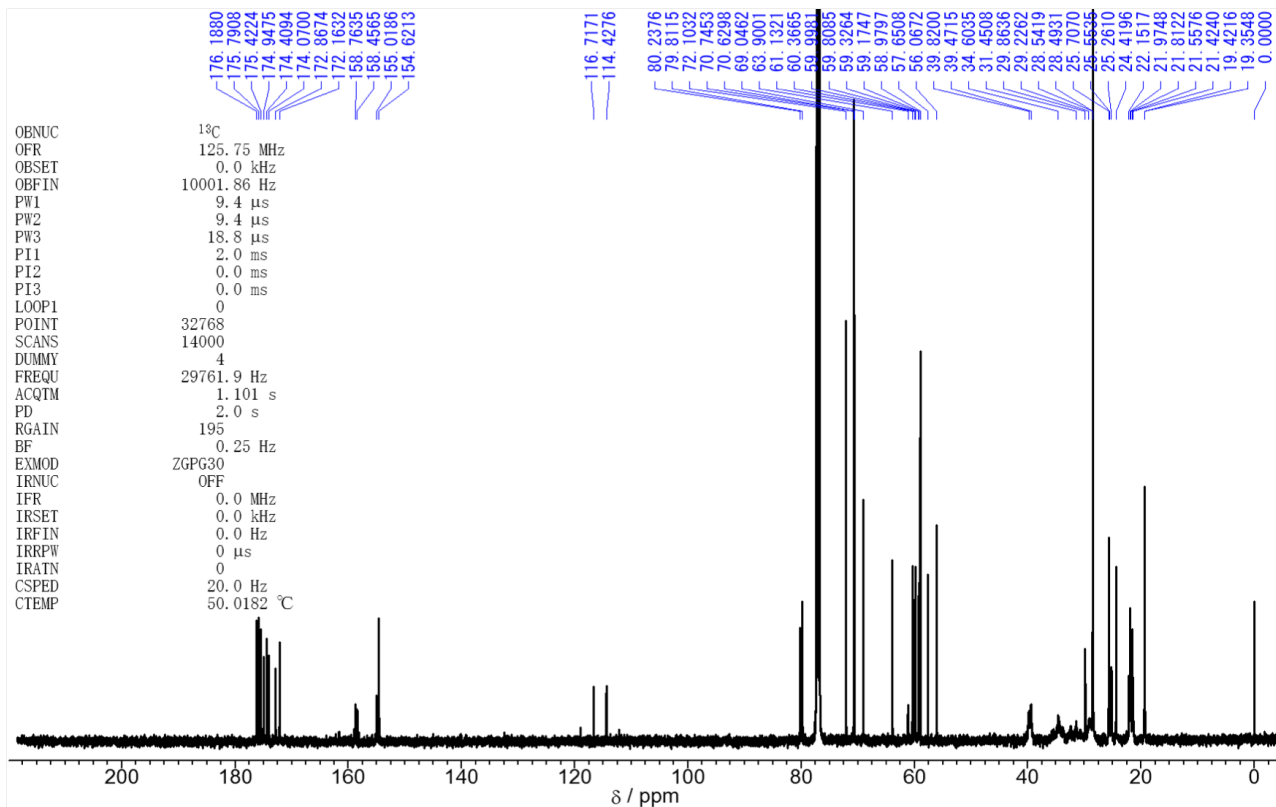

**Fig. S29**  $^{13}\text{C}$  NMR spectrum of Tfa-[Api(Boc)-(Ac<sub>6</sub>c)<sub>2</sub>]<sub>2</sub>-L-Val-Aib-OTg in CDCl<sub>3</sub> at 50  $^{\circ}\text{C}$ .



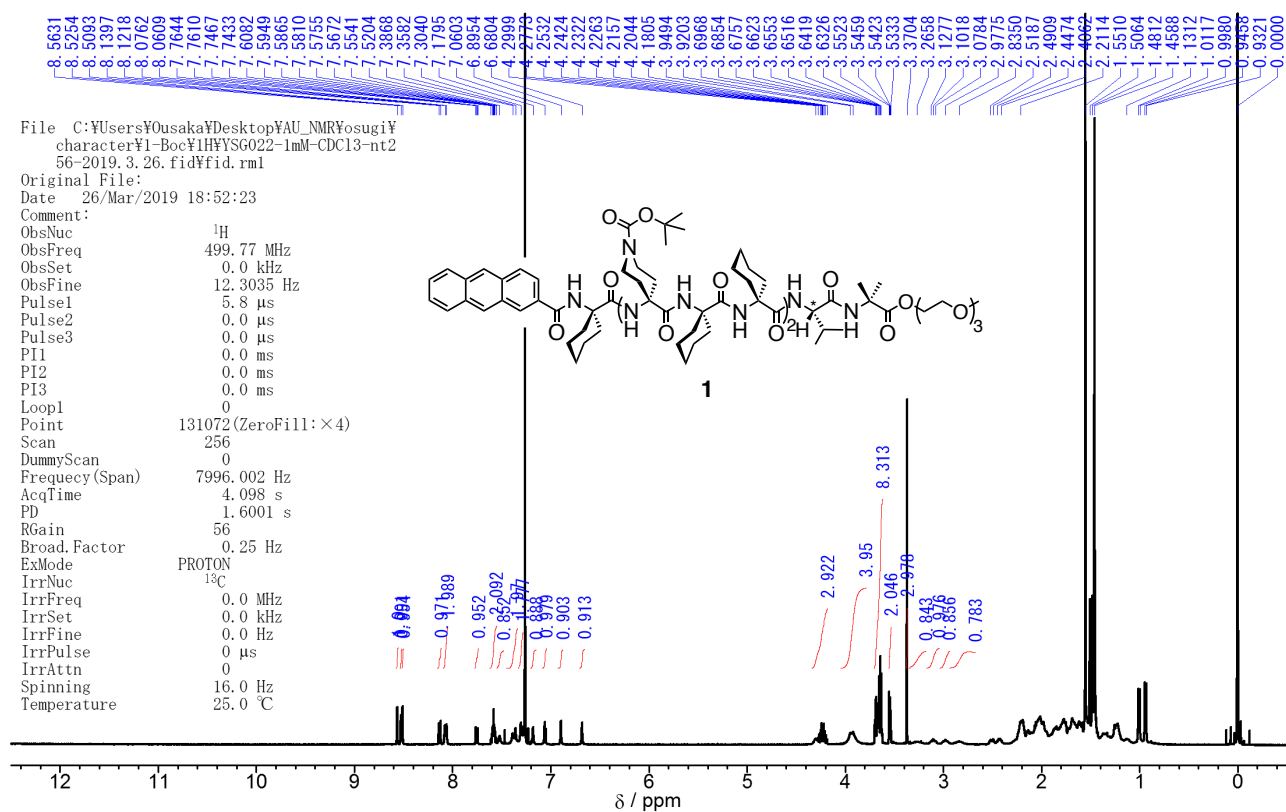

Fig. S32 <sup>1</sup>H NMR spectrum of **1** in CDCl<sub>3</sub> at 25 °C.

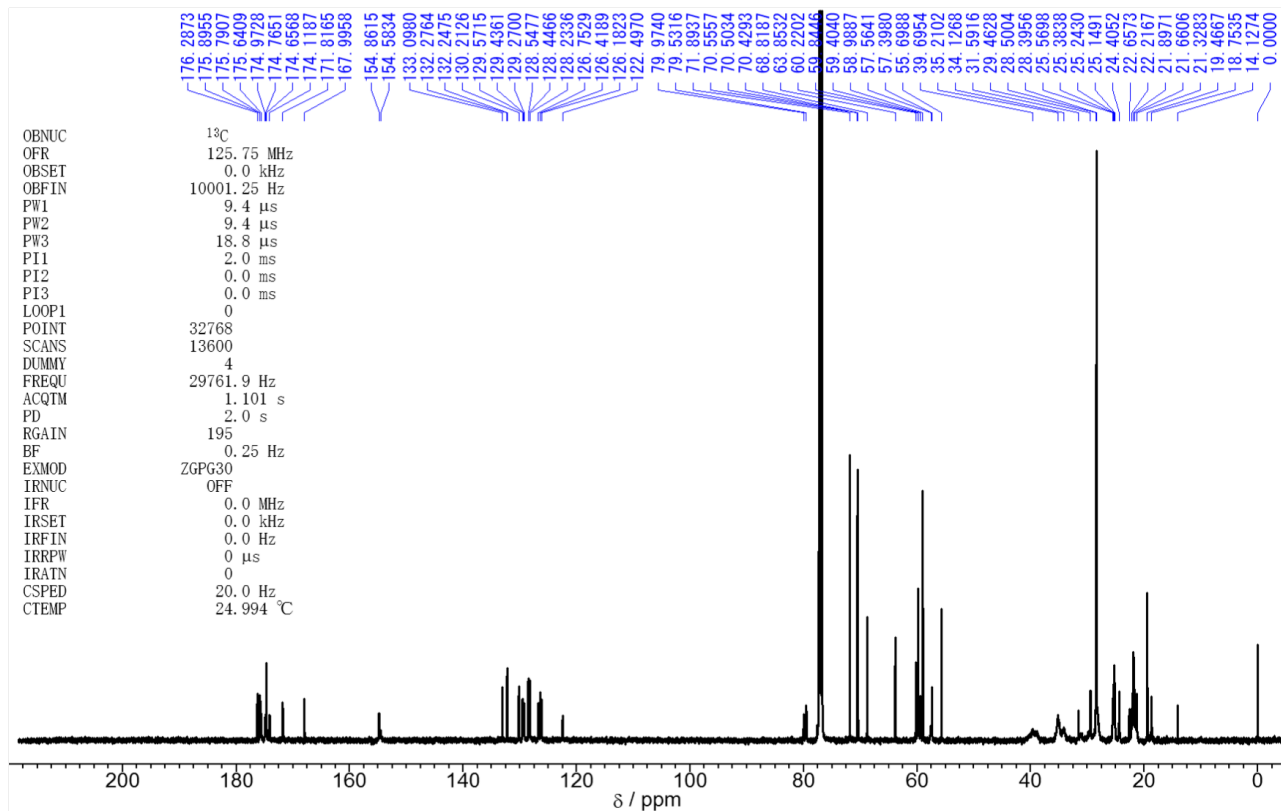

Fig. S33 <sup>13</sup>C NMR spectrum of **1** in CDCl<sub>3</sub> at 25 °C.

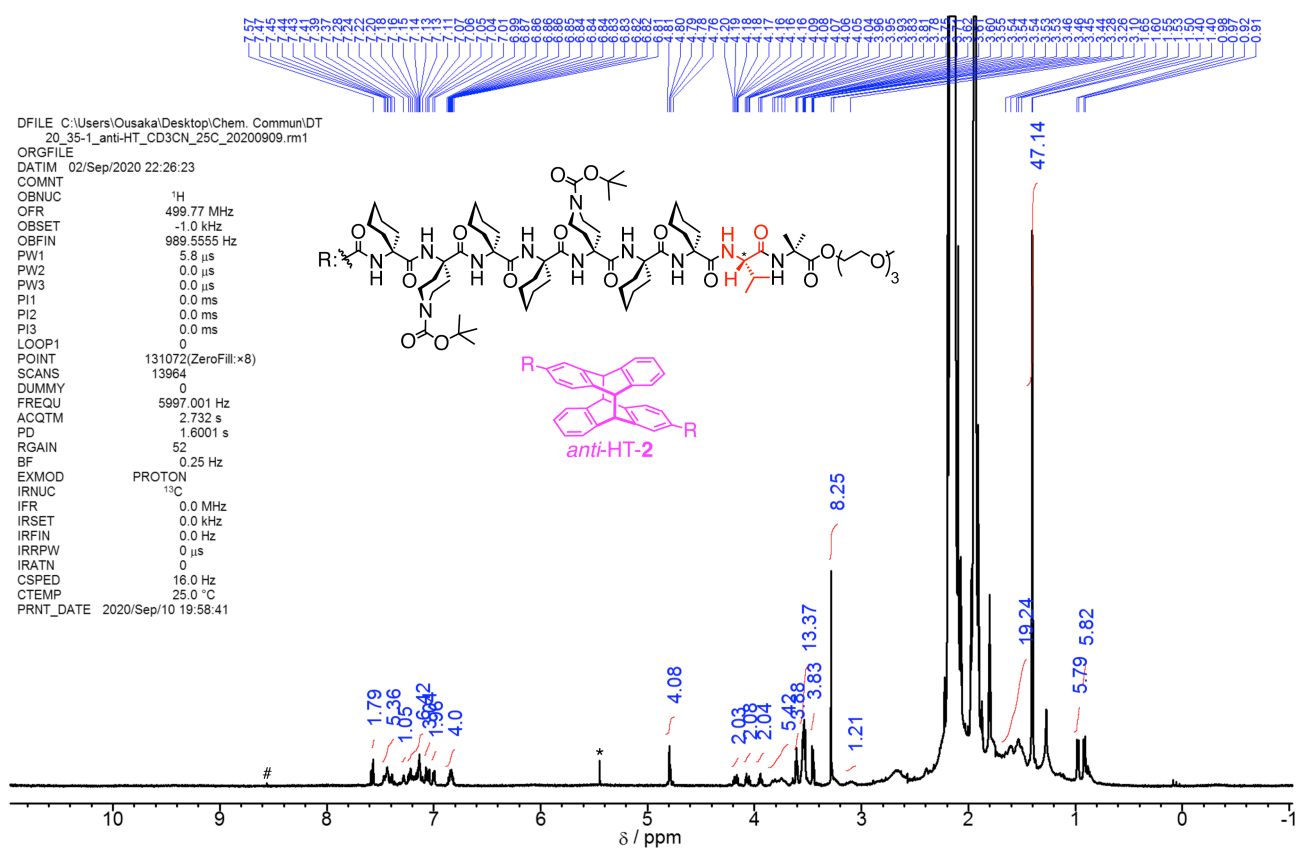

**Fig. S34** <sup>1</sup>H NMR spectrum of *anti*-HT-2 in CD<sub>3</sub>CN at 25 °C. The aliphatic protons are partially overlapping with H<sub>2</sub>O and CH<sub>3</sub>CN signals. \* and # denote CH<sub>2</sub>Cl<sub>2</sub> and unknown peaks, respectively.

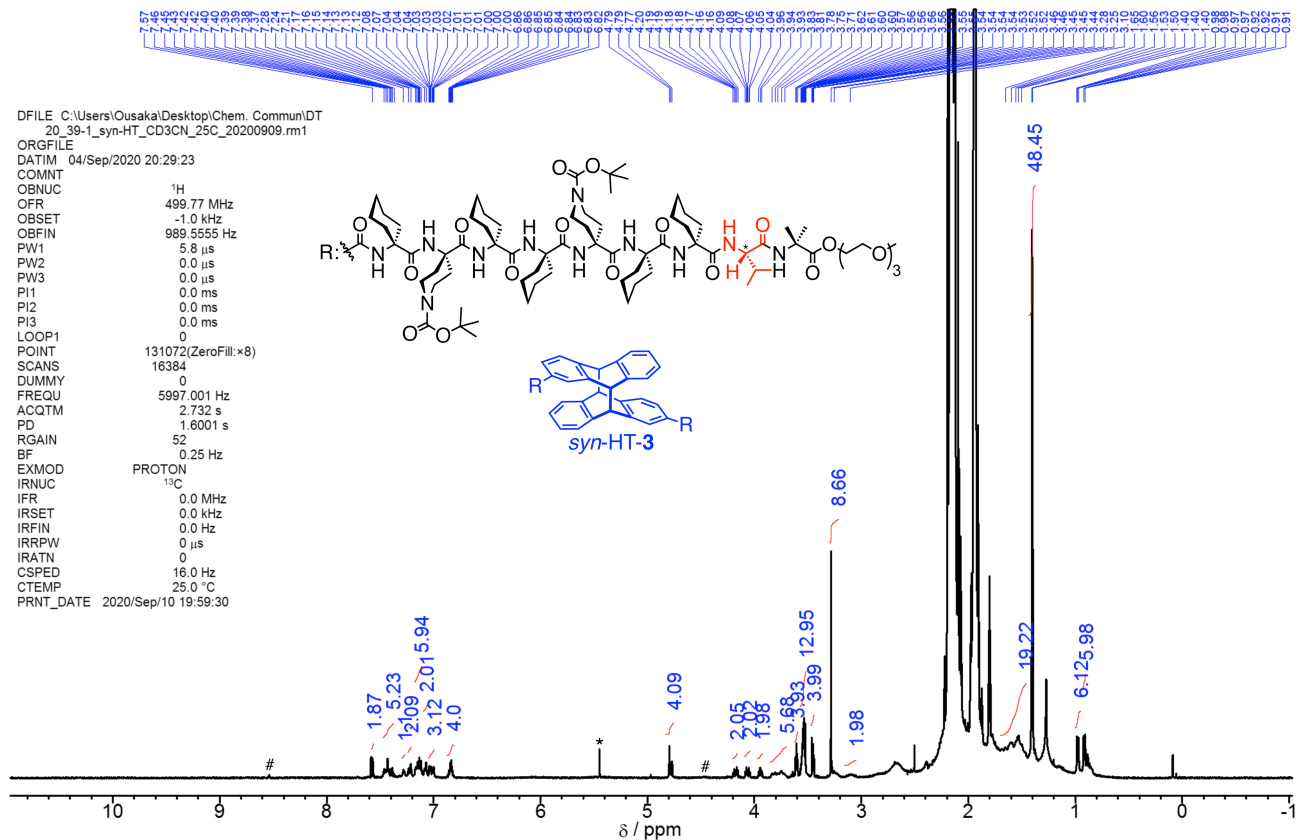

**Fig. S35** <sup>1</sup>H NMR spectrum of *syn*-HT-3 in CD<sub>3</sub>CN at 25 °C. The aliphatic protons are partially overlapping with H<sub>2</sub>O and CH<sub>3</sub>CN signals. \* and # denote CH<sub>2</sub>Cl<sub>2</sub> and unknown peaks, respectively.

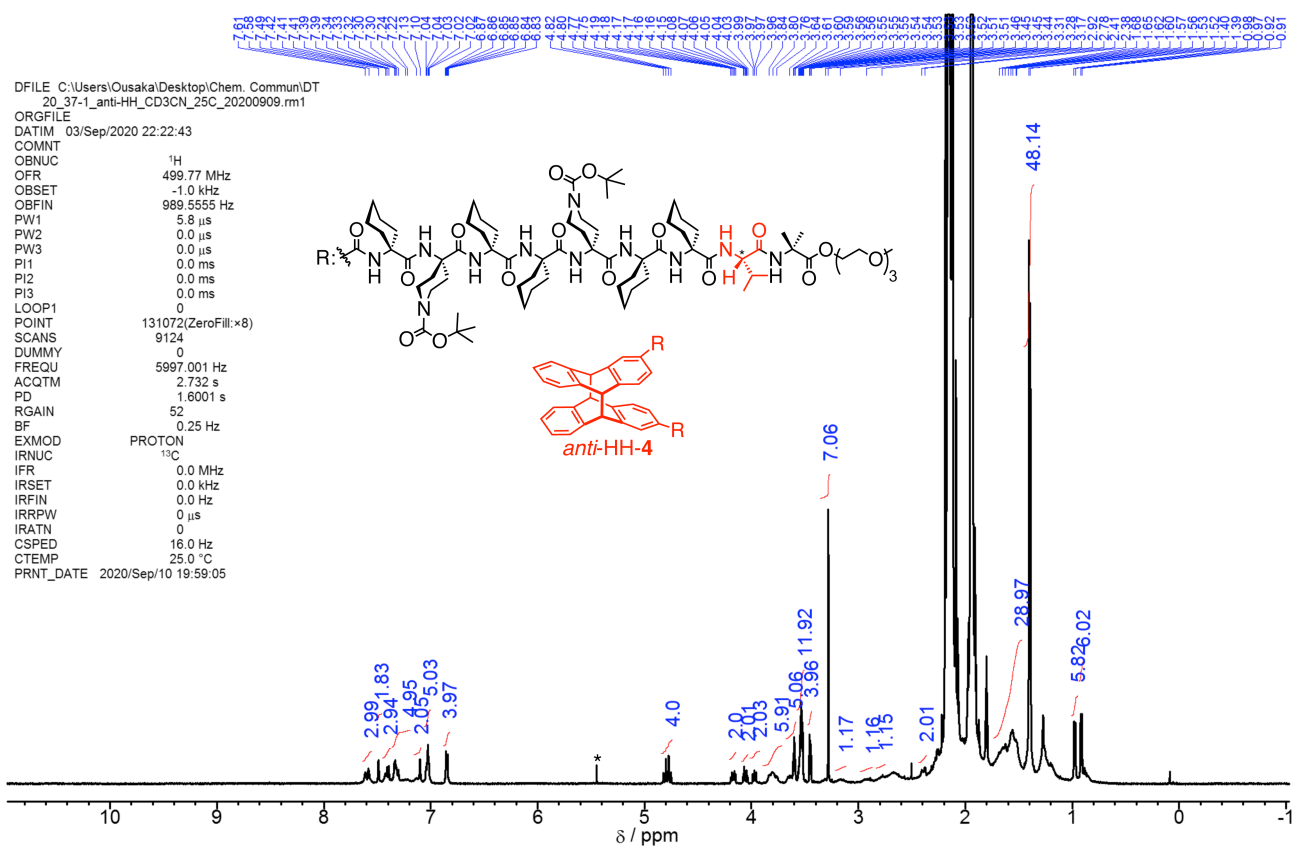

**Fig. S36**  $^1\text{H}$  NMR spectrum of *anti*-HH-4 in  $\text{CD}_3\text{CN}$  at 25  $^{\circ}\text{C}$ . The aliphatic protons are partially overlapping with  $\text{H}_2\text{O}$  and  $\text{CH}_3\text{CN}$  signals. \* and # denote  $\text{CH}_2\text{Cl}_2$  and unknown peaks, respectively.

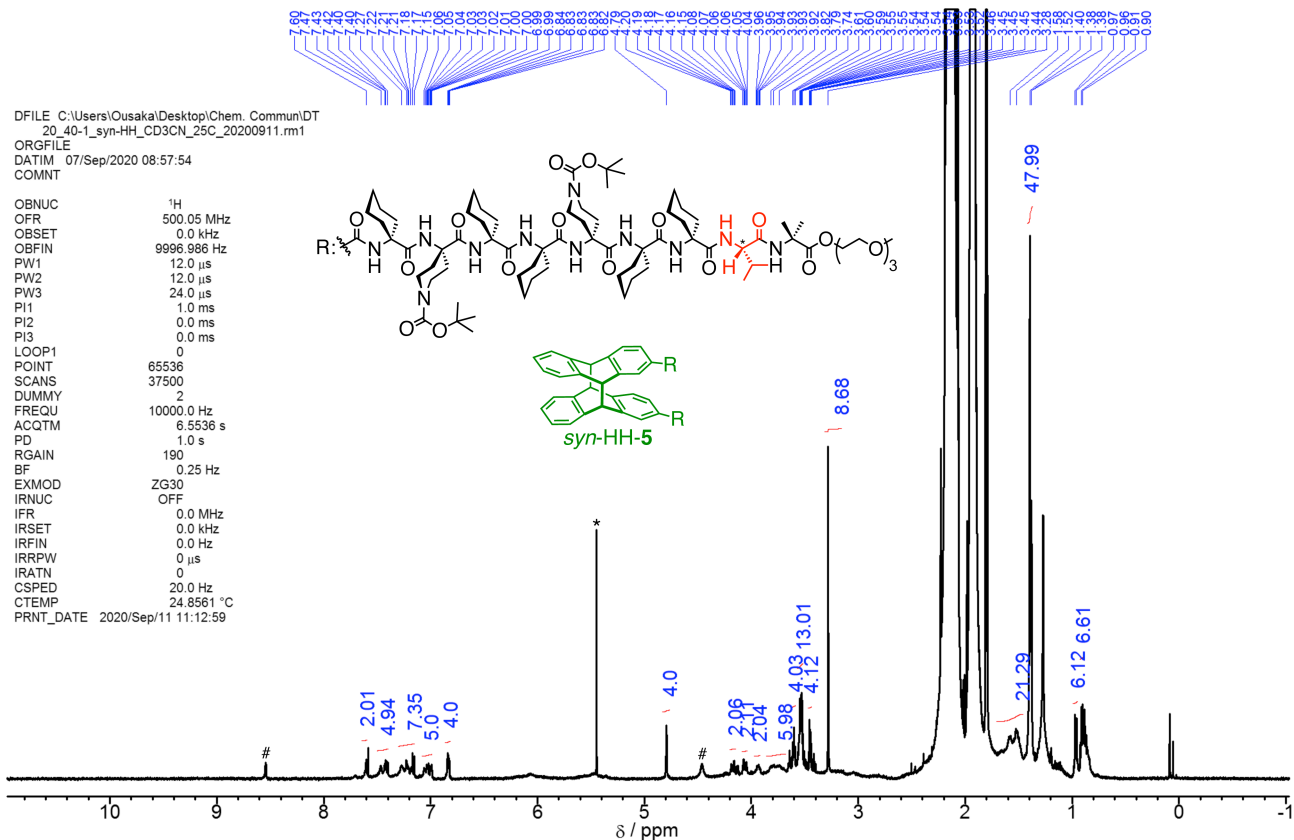

**Fig. S37**  $^1\text{H}$  NMR spectrum of *syn*-HH-5 in  $\text{CD}_3\text{CN}$  at 25  $^{\circ}\text{C}$ . The aliphatic protons are partially overlapping with  $\text{H}_2\text{O}$  and  $\text{CH}_3\text{CN}$  signals. \* and # denote  $\text{CH}_2\text{Cl}_2$  and unknown peaks, respectively.
